# Supplementary material
Source: HighWire-hosted journal article supplement (doi:10.1101/rna.080900.125)
Supplement: Supplemental_Data.xlsx [file Supplemental_Data.xlsx]

## Sheet: 1
Supplemental Data 1. Table of linear regression values. Log10 decay rate was regressed on -log2 relative codon bias (relative to genome-wide codon bias) for each codon separately. Significant slopes (p value < 0.01) are red.
codon	slope	p value	intercept	r2
CGU_R	0.24622	4.25e-62	0.62734	0.018
CAG_Q	0.21257	7.97e-89	0.40823	0.02446
CUG_L	0.20922	3.39e-42	0.43117	0.01226
ACU_T	0.19477	1.04e-79	0.45129	0.02158
AGG_R	0.1852	1.1e-42	0.46293	0.01196
CUU_L	0.1325	1.1e-44	0.32074	0.01179
CCU_P	0.1322	1.24e-40	0.31094	0.01082
AUU_I	0.12121	2.46e-39	0.29889	0.01038
CGC_R	0.11344	1.53e-09	0.09355	0.00296
GCU_A	0.10884	4.62e-42	0.23785	0.01101
UGC_C	0.10869	1.48e-16	0.20187	0.00474
AAG_K	0.10799	7.39e-50	0.25574	0.01312
CCC_P	0.09394	2.21e-08	0.19577	0.00227
GCA_A	0.09175	1.69e-14	0.31159	0.00358
CCA_P	0.08134	7.15e-14	0.26396	0.00342
AGU_S	0.08112	3.56e-10	0.30205	0.00241
GGU_G	0.07264	5.08e-15	0.19243	0.00367
UCU_S	0.07101	1.55e-14	0.18531	0.0035
UCC_S	0.06656	7.65e-06	0.29857	0.00122
GUU_V	0.06446	7.58e-15	0.1479	0.00358
GAG_E	0.05787	1.78e-15	0.14817	0.00375
AGC_S	0.04865	0.000372	0.21681	0.00074
AAU_N	0.04641	7.21e-07	0.15143	0.00144
UUG_L	0.04038	0.000106	0.18708	0.00086
CAU_H	0.02732	0.00262	0.07513	0.00051
UAU_Y	0.02467	0.0192	0.0972	0.00028
ACC_T	0.01455	0.298	0.16511	1e-05
ACA_T	0.00898	0.435	0.09435	-2e-05
GAU_D	0.00818	0.177	0.02286	5e-05
GAC_D	0.00721	0.532	0.15961	-4e-05
UUU_F	0.00518	0.576	0.08869	-4e-05
UCA_S	0.00512	0.646	0.08523	-5e-05
UUC_F	0.00181	0.844	0.04868	-6e-05
GUC_V	0.00179	0.893	0.14877	-6e-05
CAC_H	0.00035	0.979	0.03658	-7e-05
UGG_W	0	NA	0	NA
AUG_M	0	NA	0	NA
UGA_*	-0.00203	0.116	-1.21207	0.00019
UAA_*	-0.00613	0.11	-1.47082	0.00027
GGA_G	-0.00978	0.252	0.04821	2e-05
UAG_*	-0.01293	0.0823	-2.29775	0.0006
GUG_V	-0.0133	0.217	0.08388	3e-05
CGA_R	-0.01679	0.274	-0.02963	1e-05
UGU_C	-0.03424	0.000441	-0.05803	0.00075
UAC_Y	-0.03441	0.00178	-0.01433	0.00055
CUA_L	-0.04047	0.00286	0.01953	0.00052
AAC_N	-0.04344	3.22e-06	-0.02152	0.00126
CUC_L	-0.04658	0.000789	0.05726	0.00063
GAA_E	-0.05309	3.56e-13	-0.05237	0.00313
GGG_G	-0.05867	2.1e-05	-0.08371	0.00112
GCC_A	-0.06138	5e-05	0.04839	0.001
AUC_I	-0.06401	7.45e-09	-0.03586	0.00198
GGC_G	-0.0704	1.34e-06	-0.02858	0.00147
CGG_R	-0.07504	1e-05	-0.35252	0.00144
AUA_I	-0.07636	4.89e-09	-0.07633	0.00215
GUA_V	-0.10015	5.94e-13	-0.11132	0.00333
AAA_K	-0.12942	2.25e-59	-0.20106	0.01572
UCG_S	-0.14712	1.96e-21	-0.18581	0.00581
AGA_R	-0.15897	3.52e-53	-0.26959	0.01428
CAA_Q	-0.16405	9.67e-79	-0.22162	0.02135
UUA_L	-0.2404	3.18e-75	-0.40321	0.02143
ACG_U	-0.33688	4.95e-91	-0.57896	0.02733
GCG_A	-0.34438	1.84e-99	-0.58709	0.02916
CCG_P	-0.35868	2.08e-101	-0.66203	0.0303

## Sheet: 2
Supplemental Data 2. Trinucleotide SCs from scrambled CDSs (x10,000), codons, +1 frame, +2 frame. Applying Bonnferoni correction for multiple comparisons changes the alpha value from 0.05 to 0.0008 for a 95% CI.
triplet nt	scrambled ORFs SC percentiles of 10k permutations					SC			SC outside corrected 95% confidence interval
	0	0.0004	0.5	0.9996	1	codon	Frame +1	Frame +2	codon	Frame +1	Frame +2
GCU	-0.0106001	-0.00663808	0.0181886	0.0438339	0.0485267	0.228269	-0.0708814	0.0365303	TRUE	TRUE	FALSE
GCA	-0.0253638	-0.0236228	0.00343949	0.0315724	0.0335202	0.174593	-0.0127524	0.0306742	TRUE	FALSE	FALSE
GGU	0.0207805	0.0235882	0.047193	0.0725989	0.0744214	0.143734	-0.102676	0.00615468	TRUE	TRUE	TRUE
AUU	-0.0394724	-0.0356809	-0.0117714	0.0124313	0.0163047	0.127477	-0.133885	0.0176199	TRUE	TRUE	TRUE
ACU	-0.0503971	-0.047228	-0.0205726	0.00567317	0.0124718	0.114149	0.00195693	0.0205181	TRUE	FALSE	TRUE
GUU	-0.000982578	0.00622012	0.0287703	0.0524694	0.0554181	0.107654	-0.111013	-0.0770649	TRUE	TRUE	TRUE
AAG	-0.0346032	-0.0318599	-0.00850323	0.0140489	0.0249977	0.101788	-0.0142379	-0.123623	TRUE	FALSE	TRUE
GGA	0.00298978	0.0052717	0.030866	0.0535944	0.0561322	0.101007	-0.0785602	0.0440236	TRUE	TRUE	FALSE
CAG	-0.0290717	-0.0216868	0.00337782	0.0306178	0.0336309	0.100958	0.10536	0.0128329	TRUE	TRUE	FALSE
CUG	-0.0144356	-0.00895931	0.01841	0.0449277	0.0464386	0.0813312	0.324564	-0.00436126	TRUE	TRUE	FALSE
GCC	-0.0257707	-0.023086	0.00272403	0.0269223	0.0287475	0.0768427	-0.00174339	0.0014774	TRUE	FALSE	FALSE
GUC	-0.0163874	-0.00791725	0.0184847	0.0439915	0.0468283	0.062862	-0.0289222	-0.121704	TRUE	TRUE	TRUE
CUU	-0.0324979	-0.0270571	-0.00345117	0.0191721	0.0207509	0.0577392	-0.110409	0.00826534	TRUE	TRUE	FALSE
UAU	-0.0383909	-0.0360042	-0.0117322	0.0110764	0.0132365	0.0573804	-0.0226436	0.132339	TRUE	FALSE	TRUE
CCU	-0.0443391	-0.038887	-0.0169805	0.00651626	0.00957141	0.055957	0.0155923	0.0404893	TRUE	TRUE	TRUE
CGU	-0.0108597	-0.00871283	0.0183846	0.0439167	0.0456727	0.0513102	-0.17684	-0.109571	TRUE	TRUE	TRUE
GGC	0.007512	0.0102576	0.0353172	0.0612621	0.0662914	0.047539	0.0132715	0.0890548	FALSE	FALSE	TRUE
UAC	-0.0515794	-0.0458074	-0.0204808	0.00492805	0.00840553	0.0446909	-0.0639939	0.0667897	TRUE	TRUE	TRUE
GGG	0.0288869	0.03296	0.0563781	0.0768911	0.0804573	0.0408565	0.0796433	0.142387	FALSE	TRUE	TRUE
GAG	0.0057493	0.00688198	0.0309634	0.0545305	0.0612434	0.0403018	-0.0182917	-0.165424	FALSE	TRUE	TRUE
GUG	0.0191255	0.0231642	0.0472641	0.0718408	0.0750371	0.038926	0.151169	-0.0893166	FALSE	TRUE	TRUE
CCC	-0.0537336	-0.051654	-0.0309334	-0.0101289	-0.00832747	0.0371228	0.108397	0.0466352	TRUE	TRUE	TRUE
ACC	-0.0596973	-0.0551079	-0.032093	-0.00709199	-0.00353092	0.0296741	-0.0314529	-0.0524602	TRUE	FALSE	FALSE
CCA	-0.0590493	-0.0565449	-0.0318675	-0.00770059	-0.000862287	0.0224627	0.071743	-0.00131372	TRUE	TRUE	TRUE
GAU	-0.0202943	-0.0147817	0.0127786	0.0390429	0.0411171	0.0173549	-0.0943091	-0.0553808	FALSE	TRUE	TRUE
AUC	-0.0510346	-0.0468428	-0.0203426	0.00664495	0.0100668	0.0168283	-0.0995473	-0.121324	TRUE	TRUE	TRUE
CGC	-0.0292279	-0.0213696	0.00262035	0.0270397	0.0296272	0.0167031	-0.102535	-0.0668056	FALSE	TRUE	TRUE
GAC	-0.0257838	-0.0217373	0.00345777	0.0284463	0.0293351	0.0142334	-0.0222616	-0.0146478	FALSE	TRUE	FALSE
AGG	0.00511565	0.00763057	0.030769	0.0543989	0.0588386	0.0129553	0.206114	0.0456043	FALSE	TRUE	FALSE
UGA	-0.0154915	-0.0118941	0.0126519	0.0383896	0.0407921	0.0127172	-0.0157299	0.159567	FALSE	TRUE	TRUE
UAA	-0.063441	-0.0600891	-0.035803	-0.0125962	-0.0105407	0.0125785	-0.0905456	-0.0635923	TRUE	TRUE	TRUE
UUC	-0.031834	-0.0261035	-0.00356367	0.0196599	0.0213321	-0.00147099	0.00388224	-0.127638	FALSE	FALSE	TRUE
ACA	-0.0726295	-0.0642783	-0.040869	-0.0156771	-0.0109823	-0.00252147	0.0144582	-0.0890326	TRUE	TRUE	TRUE
UUU	-0.0170081	-0.0156444	0.00517157	0.0242131	0.026601	-0.0029774	-0.0562983	-0.0813873	FALSE	TRUE	TRUE
AUG	-0.022178	-0.0133782	0.0128083	0.0381733	0.0478083	-0.00452357	0.188256	-0.103579	FALSE	TRUE	TRUE
UUG	0.000476163	0.00462546	0.0287888	0.0521481	0.0557751	-0.00994356	0.288117	-0.147678	TRUE	TRUE	TRUE
AUA	-0.0602301	-0.0578673	-0.0356342	-0.0110253	-0.00937114	-0.0169311	-0.0391776	0.0837908	FALSE	FALSE	TRUE
GUA	-0.0166603	-0.0125265	0.0127661	0.0385104	0.043832	-0.0194535	-0.064008	0.0644538	TRUE	TRUE	TRUE
UAG	-0.0195328	-0.0132407	0.0129052	0.0367884	0.0452149	-0.0235693	-0.0441504	-0.113641	TRUE	TRUE	TRUE
UGG	0.0170315	0.0215918	0.0472535	0.0721284	0.0757952	-0.0366751	0.081554	0.236228	TRUE	TRUE	TRUE
GAA	-0.0334939	-0.0316247	-0.00842531	0.015085	0.0204663	-0.0396918	-0.0367048	-0.0373515	TRUE	TRUE	TRUE
AAU	-0.0599778	-0.0573731	-0.0356915	-0.0110194	-0.00936634	-0.0434326	-0.0574601	0.0290334	FALSE	TRUE	TRUE
CUC	-0.0412353	-0.0391608	-0.0171381	0.00486059	0.00928667	-0.0434563	0.00116353	-0.142682	TRUE	FALSE	TRUE
AAA	-0.0772602	-0.0727537	-0.0544959	-0.0366822	-0.0319967	-0.0439161	-0.0541056	-0.0139326	FALSE	FALSE	TRUE
UGC	-0.0115957	-0.00806929	0.0184429	0.0440111	0.0464434	-0.0469585	0.0816306	0.325653	TRUE	TRUE	TRUE
CUA	-0.0474546	-0.0445566	-0.020377	0.00376912	0.00846574	-0.0522946	0.0472777	0.0572315	TRUE	TRUE	TRUE
GCG	0.00845031	0.0120117	0.0352017	0.0605282	0.0645297	-0.0529626	-0.101376	0.0365173	TRUE	TRUE	FALSE
CAC	-0.0611659	-0.0563607	-0.0319821	-0.00785098	-0.00297818	-0.055952	0.00119507	0.0184818	FALSE	TRUE	TRUE
CAU	-0.0542646	-0.0479442	-0.0205152	0.00414408	0.00595022	-0.073106	-0.0075759	0.0726494	TRUE	FALSE	TRUE
AAC	-0.0721085	-0.0651136	-0.0407197	-0.0159047	-0.0150364	-0.0811268	-0.106499	-0.0558918	TRUE	TRUE	FALSE
UCC	-0.0443137	-0.0413701	-0.0172804	0.00530999	0.0117104	-0.0862427	0.0159791	0.00392331	TRUE	TRUE	FALSE
CGA	-0.0288069	-0.0227505	0.00354327	0.0283764	0.0361117	-0.0881686	-0.171369	-0.127731	TRUE	TRUE	TRUE
AGU	-0.0209944	-0.0123833	0.0125883	0.0378748	0.0395048	-0.0951899	0.0512024	0.0204903	TRUE	TRUE	FALSE
CAA	-0.0702342	-0.0649439	-0.0409079	-0.018462	-0.0164246	-0.0963267	0.00335617	0.0164047	TRUE	TRUE	TRUE
AGC	-0.0276871	-0.0236061	0.00343122	0.030398	0.0345005	-0.0979492	0.0654943	0.0918937	TRUE	TRUE	TRUE
CGG	0.00391337	0.00977005	0.035092	0.0598596	0.0634407	-0.118809	-0.1722	-0.119648	TRUE	TRUE	TRUE
UCU	-0.0317623	-0.0273565	-0.00355901	0.0199788	0.0218905	-0.124924	-0.060583	-0.0144985	TRUE	TRUE	FALSE
UGU	8.13163e-06	0.0044175	0.028689	0.0542806	0.0592308	-0.125999	-0.0334782	0.238442	TRUE	TRUE	TRUE
UCA	-0.0498311	-0.044933	-0.0204509	0.00511513	0.0105217	-0.153854	0.0441703	-0.0834764	TRUE	TRUE	TRUE
ACG	-0.0244484	-0.0223277	0.00351738	0.0302176	0.0348547	-0.156588	-0.147304	-0.077685	TRUE	TRUE	TRUE
UUA	-0.0363488	-0.0343596	-0.0118008	0.0137147	0.019241	-0.157354	0.0506835	-0.0103576	TRUE	TRUE	FALSE
CCG	-0.0262669	-0.0224422	0.00274366	0.0272963	0.0366295	-0.160791	-0.115077	-0.0343783	TRUE	TRUE	TRUE
AGA	-0.0341764	-0.0309902	-0.00834007	0.0139063	0.0167502	-0.178429	-0.0357377	-0.0732131	TRUE	TRUE	TRUE
UCG	-0.00960421	-0.00849768	0.0184071	0.0442815	0.0512381	-0.179925	-0.0705112	-0.0183275	TRUE	TRUE	TRUE

## Sheet: 3
Supplemental Data 3. Table of multiple regression values from regression of decay rate on composite codon frequency. Decay rate (log10) was modeled as the sum of codon terms and a constant. Codon terms were composed of the product of codon frequency variable and its coefficient. Coefficients were estimated through multiple regression on 16,935 Arabidopsis seedling mRNAs and indicate how much infl…
codon	coefficient estimate	p value	95% confidence interval
GCA_A	-4.6644	5.88889e-34	-5.41535	-3.91345
CAG_Q	-3.62019	2.92234e-22	-4.35045	-2.88993
CUG_L	-3.48291	1.28805e-11	-4.49061	-2.47521
GCU_A	-3.31481	4.38527e-35	-3.83934	-2.79027
CCC_P	-3.276	5.35154e-06	-4.68666	-1.86534
AUU_I	-2.8217	2.24897e-14	-3.54541	-2.09799
CGC_R	-2.78446	0.0004542	-4.34068	-1.22824
GGU_G	-2.62285	6.16211e-18	-3.21793	-2.02777
ACU_T	-2.61985	1.10431e-10	-3.41526	-1.82445
CGU_R	-2.33716	6.92206e-07	-3.25975	-1.41456
UAU_Y	-2.33275	3.20827e-08	-3.15925	-1.50625
GGG_G	-2.16039	4.71325e-05	-3.2007	-1.12007
(Intercept)	-2.12346	1.05129e-260	-2.24198	-2.00493
GGA_G	-2.01305	6.49235e-11	-2.61674	-1.40937
CCU_P	-1.61382	2.34169e-06	-2.28357	-0.944081
GUC_V	-1.40535	0.00237012	-2.31151	-0.499196
GUU_V	-1.3385	1.8628e-05	-1.95121	-0.725791
CCA_P	-1.29725	0.000548135	-2.03284	-0.561655
AAG_K	-1.19948	5.78321e-09	-1.60303	-0.79592
GAG_E	-1.04661	6.83534e-05	-1.56167	-0.531548
GAU_D	-0.899953	0.000181624	-1.37109	-0.428815
AAA_K	0.772318	0.00527186	0.229787	1.31485
GAA_E	0.827278	0.000706214	0.348631	1.30592
AUG_M	1.22765	0.00016043	0.590248	1.86505
UCC_S	1.2436	0.00489641	0.377409	2.10979
AAC_N	1.34803	4.34016e-05	0.701944	1.99412
CAU_H	1.64506	9.72231e-05	0.817918	2.47219
UCU_S	1.80978	3.22564e-10	1.24593	2.37363
AGU_S	2.07217	4.65443e-06	1.18559	2.95875
CAC_H	2.31555	1.01348e-05	1.28767	3.34343
AGC_S	2.34668	9.74293e-07	1.40769	3.28567
CAA_Q	2.82646	4.04012e-17	2.16854	3.48437
UCG_S	2.92212	2.34979e-09	1.96349	3.88075
UCA_S	2.98817	9.79711e-17	2.28384	3.69249
CGG_R	3.3912	3.08367e-06	1.96684	4.81555
UGU_C	3.63336	4.35358e-20	2.85847	4.40825
ACG_T	4.41499	8.27541e-16	3.34104	5.48893
UUA_L	4.82679	1.01136e-23	3.88594	5.76763
CCG_P	5.03224	6.6563e-29	4.14978	5.91471
AGA_R	5.11384	6.18795e-55	4.47407	5.7536

## Sheet: 4
Supplemental Data 4. Codon decay coeficients of codons with significant terms from multiple regression of log10 decay rate on composite codon frequency using 7,555 RNAs that are more than 50% VCS-dependent in a Col-0/sov background.
codon	coefficient estimate	p value	95% confidence interval
GCA_A	-5.44321	8.65763e-23	-6.52555	-4.36087
CAG_Q	-4.75096	4.47116e-19	-5.7917	-3.71022
CTG_L	-4.03953	2.26851e-08	-5.45454	-2.62452
GCT_A	-3.46742	8.36364e-20	-4.21159	-2.72325
CCC_P	-3.21297	0.0020087	-5.25125	-1.1747
ATT_I	-3.08422	3.07083e-09	-4.10293	-2.06551
TAT_Y	-2.86228	1.01401e-06	-4.00901	-1.71555
GGC_G	-2.727	0.000276726	-4.19645	-1.25755
CGT_R	-2.70558	2.24953e-05	-3.95609	-1.45508
GGT_G	-2.51974	5.64327e-09	-3.36643	-1.67305
GGA_G	-2.42159	5.0156e-08	-3.29159	-1.55159
ACT_T	-2.12057	0.00023483	-3.25015	-0.990987
CCT_P	-2.08431	1.43424e-05	-3.02545	-1.14318
(Intercept)	-2.07995	9.7084e-215	-2.20609	-1.95381
CCA_P	-1.59273	0.00328075	-2.65432	-0.531147
GAT_D	-1.40524	3.19898e-05	-2.06721	-0.743277
AAG_K	-1.40335	6.78219e-07	-1.95667	-0.850031
GTT_V	-1.29166	0.00335461	-2.15461	-0.428718
AAC_N	1.77329	0.000102596	0.878862	2.66771
CAT_H	1.84349	0.00165193	0.695435	2.99155
CAC_H	2.19732	0.00298815	0.746994	3.64766
TCT_S	2.3172	1.04259e-08	1.52448	3.10992
TCC_S	2.33806	0.000170969	1.11922	3.55691
TCA_S	2.53369	4.88816e-07	1.54726	3.52012
AGT_S	2.89692	5.51384e-06	1.64815	4.14568
AGC_S	3.27715	1.59275e-06	1.93964	4.61465
TCG_S	3.53928	1.97396e-07	2.20675	4.87181
TGT_C	3.97932	3.10126e-13	2.9112	5.04744
CAA_Q	4.0951	6.36736e-18	3.16678	5.02342
ACG_T	5.4539	3.2787e-12	3.92149	6.9863
CCG_P	5.80909	1.46393e-19	4.55391	7.06426
TTA_L	5.88852	4.25356e-18	4.56077	7.21626
AGA_R	5.89378	1.82006e-35	4.96902	6.81854

## Sheet: 5
Supplemental Data 5. Codon decay coeficients of codons with significant terms from multiple regression of log10 decay rate on composite codon frequency using 3445 RNAs that are more than 50% VCS-dependent in an SOV background.
codon	coefficient estimate	p value	95% confidence interval
GCA_A	-5.69214	1.28897e-15	-7.08132	-4.30296
CAG_Q	-5.4672	1.89537e-15	-6.80956	-4.12485
CGT_R	-4.09518	1.51989e-07	-5.62133	-2.56903
CCC_P	-3.79727	0.00240802	-6.24881	-1.34574
GCT_A	-3.75436	5.0962e-15	-4.69085	-2.81788
TAT_Y	-3.28249	1.69594e-05	-4.77652	-1.78846
ATT_I	-3.10624	4.07317e-06	-4.42588	-1.7866
ACT_T	-2.99123	5.49618e-05	-4.44343	-1.53904
GGT_G	-2.65644	1.30741e-07	-3.64121	-1.67168
AAG_K	-2.61696	5.1597e-17	-3.22584	-2.00808
GGC_G	-2.52626	0.00536581	-4.30413	-0.748391
(Intercept)	-1.92976	2.32196e-197	-2.0478	-1.81172
TCT_S	2.08503	1.93347e-05	1.12954	3.04052
TCA_S	2.70928	7.93472e-06	1.52193	3.89663
AGT_S	2.93994	0.000283669	1.35355	4.52633
CAC_H	2.96595	0.00055138	1.28415	4.64774
TCG_S	3.01686	0.000325059	1.37294	4.66078
AGC_S	3.38483	5.69494e-05	1.73813	5.03153
TGT_C	3.73535	7.1016e-08	2.37921	5.09149
CCG_P	3.81727	6.87552e-08	2.43289	5.20166
AGA_R	4.0957	1.39121e-12	2.96651	5.22489
CTA_L	4.5395	8.14919e-06	2.54749	6.53151
TTA_L	4.81915	2.90855e-08	3.11967	6.51863
CAA_Q	4.90645	3.89357e-17	3.76941	6.04349
ACG_T	5.18607	1.47934e-08	3.39518	6.97697

## Sheet: 6
Supplemental Data 6. Codon decay coeficients of codons with significant terms from multiple regression of log10 decay rate on composite codon frequency using 6020 RNAs that are more than 50% RH-dependent in a Col-0/sov background.
codon	coefficient estimate	p value	95% confidence interval
CTG_L	-3.03179	3.15549e-07	-4.19267	-1.8709
CAG_Q	-2.70437	4.78066e-10	-3.55445	-1.85428
GCA_A	-2.70368	7.97067e-10	-3.56474	-1.84263
ACT_T	-2.48128	1.55171e-07	-3.40735	-1.55522
GCT_A	-2.36891	3.78814e-14	-2.98104	-1.75678
(Intercept)	-2.3212	0	-2.40102	-2.24137
ATT_I	-2.19304	3.48348e-07	-3.03585	-1.35022
TAT_Y	-2.01869	2.64872e-05	-2.9598	-1.07759
GGG_G	-1.72686	0.00539516	-2.94307	-0.51065
CCT_P	-1.72054	4.91083e-06	-2.45815	-0.982936
GGT_G	-1.38161	3.35626e-05	-2.03409	-0.729127
TTC_F	1.20553	0.000758276	0.504124	1.90694
TGG_W	1.31345	0.00788027	0.344758	2.28215
TCC_S	1.33612	0.00736101	0.359133	2.31311
CAT_H	1.34502	0.0057006	0.391593	2.29845
ATG_M	1.81675	8.9055e-07	1.09281	2.54069
AGC_S	1.89261	0.000627646	0.808134	2.97709
AAC_N	2.03958	6.38194e-08	1.30115	2.77802
CTA_L	2.07415	0.0012696	0.813075	3.33523
CAC_H	2.29765	0.000156447	1.10701	3.4883
CAA_Q	2.91581	1.27005e-14	2.17618	3.65543
TCG_S	3.27518	2.84258e-09	2.196	4.35436
TCA_S	3.27635	9.96037e-17	2.50526	4.04743
TGT_C	3.61039	4.84729e-15	2.70892	4.51186
ACG_T	3.73919	2.76012e-09	2.50812	4.97026
AGA_R	3.84349	6.26858e-24	3.09977	4.58721
CCG_P	3.92556	1.42875e-14	2.92785	4.92328
TTA_L	4.68722	9.31697e-18	3.61988	5.75456

## Sheet: 7
Supplemental Data 7. Codon decay coeficients of codons with significant terms from multiple regression of log10 decay rate on composite codon frequency using 6007 RNAs that are less than 50% RH&VCS (with or without SOV) dependent.
codon	coefficient estimate	p value	95% confidence interval
GCT_A	-4.80422	5.20319e-23	-5.75375	-3.85468
GCA_A	-4.77972	1.15989e-11	-6.15796	-3.40148
GGT_G	-4.46642	2.11158e-15	-5.56697	-3.36588
CGC_R	-4.28552	0.00297292	-7.11254	-1.45851
CGT_R	-3.69345	4.59264e-05	-5.46876	-1.91815
CTG_L	-3.65949	9.19573e-05	-5.49258	-1.82639
ATT_I	-3.56994	3.77283e-08	-4.84044	-2.29944
CCC_P	-3.43009	0.00809911	-5.96869	-0.8915
GGG_G	-3.22595	0.000903352	-5.13038	-1.32151
ACT_T	-3.22038	1.44234e-05	-4.67471	-1.76605
CAG_Q	-3.17651	3.41262e-06	-4.51606	-1.83696
GGA_G	-2.90155	2.10626e-07	-3.9963	-1.8068
TAT_Y	-2.84053	0.000155484	-4.31189	-1.36917
GTC_V	-2.77702	0.000858783	-4.40949	-1.14455
ACC_T	-2.6502	0.00288723	-4.39317	-0.907219
GAG_E	-2.39717	3.14379e-07	-3.31493	-1.47941
TTC_F	-2.39689	7.93432e-05	-3.58671	-1.20706
GTT_V	-2.08867	0.000212119	-3.19339	-0.983949
AAG_K	-1.83958	2.3783e-06	-2.60315	-1.07601
CCT_P	-1.83336	0.00227355	-3.01048	-0.656248
(Intercept)	-1.48632	7.26409e-67	-1.65288	-1.31976
GAT_D	-1.23095	0.00600852	-2.10899	-0.352915
AGT_S	2.2499	0.00914136	0.558434	3.94136
TGT_C	2.27685	0.00182009	0.846039	3.70767
TTA_L	2.84219	0.00139433	1.09957	4.58482
TCA_S	3.02015	6.65859e-06	1.7069	4.3334
CCG_P	3.96124	1.7983e-06	2.33654	5.58595
AGA_R	4.49851	4.50085e-13	3.2831	5.71391
CGG_R	4.92098	0.000370162	2.2131	7.62886

## Sheet: 8
Supplemental Data 8. tRNAscan-SE2_folding results for 206 unique tRNA sequences. After folding prediction, sequences were checked for conservation of NOT3 interacting nucleotids C(12)U(13), A(22)G(23), and A(46) (gene ids and amino acid are red).
2o structure	5'stem>..>>>>.D-loop.<<<<.>>>>>ac.loop<<<<<varl>>>>>TΨCloop<3'accept_stem
	5 10 20 30 40 50 60 70 80 90
NOT3 interaction residues	* | gU * | ac * | * | *a | * | * | * | * | * |
	* | cU * | ag * | * | *a | * | * | * | * | * |
AT1G01270.trna1	(1-72)	Length:	72	bp
Type:	Gln	Anticodon:	CUG	at	34-36	(34-36)	Score:	72.9
Seq:	GGUUCCAUGGUCUAGCGGUUAGGACACUAGACUCUGAAUCUAGUAaCCCGAGUUCAAGUCUCGGUGGAACCU
Str:	>>>>>>>..>>>>........<<<<.>>>>>.......<<<<<....>>>>>.......<<<<<<<<<<<<.
AT1G01870.trna1	(1-73)	Length:	73	bp
Type:	Val	Anticodon:	UAC	at	34-36	(34-36)	Score:	74.4
Seq:	GGUGCUGUGGUGUAGUGGUUAUCACGUUUGCCUUACACGCAAAAGGUCUCCAGUUCGAUCCUGGGCAGCACCA
Str:	>>>>>>>..>>>..........<<<.>>>>>.......<<<<<.....>>>>>.......<<<<<<<<<<<<.
AT1G01890.trna1	(1-73)	Length:	73	bp
Type:	Lys	Anticodon:	CUU	at	34-36	(34-36)	Score:	87.7
Seq:	GCCCGUCUAGCUCAGUUGGUAGAGCGCAAGGCUCUUAACCUUGUGGUCGUGGGUUCGAGCCCCACGGUGGGCG
Str:	>>>>>>>..>>>>........<<<<.>>>>>.......<<<<<.....>>>>>.......<<<<<<<<<<<<.
AT1G02480.trna1	(1-73)	Length:	73	bp
Type:	Phe	Anticodon:	GAA	at	34-36	(34-36)	Score:	78.3
Seq:	GCGGGGAUAGCUCAGUUGGGAGAGCGUCAGACUGAAGAUCUGAAGGUCGCGUGUUCGAUCCACGCUCACCGCA
Str:	>>>>.>>..>>>>........<<<<.>>>>>.......<<<<<.....>>>>>.......<<<<<<<.<<<<.
AT1G02600.trna1	(1-72)	Length:	72	bp
Type:	His	Anticodon:	GUG	at	34-36	(34-36)	Score:	63
Seq:	GUGGCUGUAGUUUAGUGGUaAGAAUUCCACGUUGUGGCCGUGGAGaCCUGGGCUCGAAUCCCAGCAGCCACA
Str:	>>>>>>>..>>>>........<<<<.>>>>>.......<<<<<....>>>>>.......<<<<<<<<<<<<.
AT1G03515.trna1	(1-72)	Length:	72	bp
Type:	Asp	Anticodon:	GUC	at	34-36	(34-36)	Score:	69.8
Seq:	GUCGUUGUAGUAUAGUGGUaAGUAUUCCCGCCUGUCACGCGGGUGaCCCGGGUUCGAUCCCCGGCAACGGCG
Str:	>>>>>>>..>>>>........<<<<.>>>>>.......<<<<<....>>>>>.......<<<<<<<<<<<<.
AT1G03570.trna1	(1-72)	Length:	72	bp
Type:	Gln	Anticodon:	CUG	at	34-36	(34-36)	Score:	74.7
Seq:	GGUCCCAUGGUCUAGUGGUcAGGACAUUGGACUCUGAAUCCAGUAaCCCGAGUUCAAGUCUCGGUGGGACCU
Str:	>>>>>>>..>>>>........<<<<.>>>>>.......<<<<<....>>>>>.......<<<<<<<<<<<<.
AT1G04320.trna1	(1-71)	Length:	71	bp
Type:	Gly	Anticodon:	GCC	at	33-35	(33-35)	Score:	47.5
Seq:	UAACCAGUGGUCUAGUGGUAGAAUAGUACCCUGCCACGGUACAGaCCCGGGUUCGAUUCCCGGCUGGUGCA
Str:	..>>>>>..>>.>.......<.<<.>>>>>.......<<<<<....>>>>>.......<<<<<<<<<<...
AT1G04720.trna1	(1-75)	Length:	75	bp
Type:	MeU	Anticodon:	CAU	at	35-37	(35-37)	Score:	64.7
Seq:	GGGGUGGUGGCGCAGUUGGCUAGCGCGUAGGUCUCAUAgAUCCUGAGGUCGAGAGUUCGAGCCUCUCUCACCCCA
Str:	>>>>>>>..>>>>.........<<<<.>>>>..........<<<<.....>>>>>.......<<<<<<<<<<<<.
AT1G05390.trna1	(1-74)	Length:	74	bp
Type:	Asn	Anticodon:	GUU	at	35-37	(35-37)	Score:	83.7
Seq:	GCUGGAAUAGCUCAGCUGGUUAGAGCGUGUGGCUGUUAACCACAAGGUCGGAGGUUCGAACCCUCCUUCUAGCG
Str:	>>>>>>>..>>>>.........<<<<.>>>>>.......<<<<<.....>>>>>.......<<<<<<<<<<<<.
AT1G05980.trna1	(1-72)	Length:	72	bp
Type:	Thr	Anticodon:	UGU	at	33-35	(33-35)	Score:	83
Seq:	GCCCGUAUAGCUCAGUGGUAGAGCGUCAGUCUUGUAAACUGAAGGUCCGUAGUUCGAUCCUGCGUGUGGGCA
Str:	>>>>>>>..>>>>.......<<<<.>>>>>.......<<<<<.....>>>>>.......<<<<<<<<<<<<.
AT1G06480.trna1	(1-74)	Length:	74	bp
Type:	Ile	Anticodon:	AAU	at	35-37	(35-37)	Score:	85.5
Seq:	GGCCCAUUAGCUCAGUUGGUUAGAGCGUCGUGCUAAUAACGCGAAGGUCGCAGGUUCGAAACCUGCAUGGGCCA
Str:	>>>>>>>..>>>>.........<<<<.>>>>>.......<<<<<.....>>>>>.......<<<<<<<<<<<<.
AT1G06610.trna1	(1-73)	Length:	73	bp
Type:	Ala	Anticodon:	AGC	at	34-36	(34-36)	Score:	63.4
Seq:	GGGGAUGUAGCUCAGAUGGUAGAGCGCUCGCUUAGCAUGCGAGAGGUACGGGGAUCGAUACCCCGCAUCUCCA
Str:	>>>>>>>..>>>>........<<<<.>>>>>.......<<<<<.....>>>>>.......<<<<<<<<<<<<.
AT1G06860.trna1	(1-71)	Length:	71	bp
Type:	Gly	Anticodon:	GCC	at	33-35	(33-35)	Score:	66.5
Seq:	GCACCAGUGGUCUAGUGGUAGAAUAGUACCCUGCCACGGUACAGaCCCGGGUUCGAUUCCCGGCUGGUGCA
Str:	>>>>>>>..>>.>.......<.<<.>>>>>.......<<<<<....>>>>>.......<<<<<<<<<<<<.
AT1G07100.trna1	(1-74)	Length:	74	bp
Type:	Ile	Anticodon:	UAU	at	35-37	(35-37)	Score:	85.9
Seq:	GGUCCCGUAGCUCAGUUGGUUAGAGCGUUGGUCUUAUGAGCCGAAGGUCGCGGGUUCGAGCCCCGCCGGGACCA
Str:	>>>>>>>..>>>>.........<<<<.>>>>>.......<<<<<.....>>>>>.......<<<<<<<<<<<<.
AT1G08240.trna1	(1-72)	Length:	72	bp
Type:	Gly	Anticodon:	UCC	at	34-36	(34-36)	Score:	74.1
Seq:	GCGUCUGUAGUCCAACGGUUAGGAUAAUUGCCUUCCAAGCAAUAGaCCCGGGUUCGACUCCCGGCAGACGCA
Str:	>>>>>>>..>>>>........<<<<.>>>>>.......<<<<<....>>>>>.......<<<<<<<<<<<<.
AT1G08870.trna1	(1-73)	Length:	73	bp
Type:	Ala	Anticodon:	UGC	at	34-36	(34-36)	Score:	70
Seq:	GGGGAUGUAGCUCAAAUGGUAGAGCGCUCGCUUUGCAUGCGAGAGGcACGGGGUUCGAUCCCCCGCAUCUCCA
Str:	>>>>>>>..>>>>........<<<<.>>>>>.......<<<<<.....>>>>>.......<<<<<<<<<<<<.
AT1G08950.trna1	(1-72)	Length:	72	bp
Type:	Pro	Anticodon:	AGG	at	33-35	(33-35)	Score:	68.2
Seq:	GGGCGUUUGGUCUAGUGGUAUGAUUCUCGCUUAGGGUGCGAGAGGUCCCGAGUUCAAUUCUCGGAACGCCCC
Str:	>>>>>>>..>>>.........<<<.>>>>>.......<<<<<.....>>>>>.......<<<<<<<<<<<<.
AT1G09110.trna1	(1-72)	Length:	72	bp
Type:	Glu	Anticodon:	UUC	at	34-36	(34-36)	Score:	69.9
Str:	>>>>>>>..>>>>........<<<<.>>>>>.......<<<<<....>>>>>.......<<<<<<<<<<<<.
AT1G11030.trna1	(1-74)	Length:	74	bp
Type:	Arg	Anticodon:	UCG	at	35-37	(35-37)	Score:	81.9
Seq:	GACCGCAUAGCGCAGUGGAUUAGCGCGUCUGACUUCGGAUCAGAAGGUCGUGGGUUCGACUCCCACUGUGGUCG
AT1G11550.trna1	(1-80)	Length:	80	bp
Type:	Leu	Anticodon:	UAG	at	35-37	(35-37)	Score:	69.5
Seq:	GACAGUUUGGCCGAGUGGUcUAAGGCGCCAGAUUUAGGCUCUGGUccgaaaGGgCGUGGGUUCAAAUCCCACAGCUGUCA
Str:	>>>>>>>..>>>...........<<<.>>>>>.......<<<<<...........>>>>>.......<<<<<<<<<<<<.
AT1G11640.trna1	(1-72)	Length:	72	bp
Type:	Trp	Anticodon:	CCA	at	33-35	(33-35)	Score:	75.8
Seq:	GGAUCCGUGGCGCAAUGGUAGCGCGUCUGACUCCAGAUCAGAAGGUUGCGUGUUCGAUUCACGUCGGGUUCA
Str:	>>>>>>>..>>>>.......<<<<.>>>>>.......<<<<<.....>>>>>.......<<<<<<<<<<<<.
Type:	Val	Anticodon:	AAC	at	35-37	(35-37)	Score:	72.5
Seq:	GGUUUCGUGGUGUAGUUGGUUAUCACGUCAGUCUAACACACUGAAGGUCUCCGGUUCGAACCCGGGCGAAGCCA
Str:	>>>>>>>..>>>...........<<<.>>>>>.......<<<<<.....>>>>>.......<<<<<<<<<<<<.
AT1G13010.trna1	(1-73)	Length:	73	bp
Seq:	GACUUCAUGGCCCAAUGGAUAAGGCGCUGGUCUACGAAACCAGAGAUUCUGGGUUCGAUCCCCAGUGAAGUCG
Str:	>>>>>>>..>>>..........<<<.>>>>>.......<<<<<.....>>>>>.......<<<<<<<<<<<<.
AT1G13720.trna1	(1-72)	Length:	72	bp
Type:	Thr	Anticodon:	CGU	at	33-35	(33-35)	Score:	82.3
Seq:	GCCUCCGUAGCAUAGUGGUAUUGCGUUCGCUUCGUAAGCGAAAGGcCGCGAGUUCGAUCCUCGCCGGGGGCU
Str:	>>>>>>>..>>>.........<<<.>>>>>.......<<<<<.....>>>>>.......<<<<<<<<<<<<.
AT1G15090.trna1	(1-74)	Length:	74	bp
Type:	Asn	Anticodon:	GUU	at	35-37	(35-37)	Score:	74.7
Seq:	GCUGGAAUAGCUCAGAUGGCUAGAGCGUGUGGCUGUUAACCACAAGGUCGGAGGUUCAAGCCCUCCUUCUAGCG
Str:	>>>>>>>..>>>>.........<<<<.>>>>>.......<<<<<.....>>>>>.......<<<<<<<<<<<<.
AT1G15450.trna1	(1-72)	Length:	72	bp
Type:	Trp	Anticodon:	CCA	at	33-35	(33-35)	Score:	75.8
Seq:	GGAUCCGUGGCGCAAUGGUAGCGCGUCUGACUCCAGAUCAGAAGGUUGCGUGUUCGAUUCACGUCGGGUUCA
Str:	>>>>>>>..>>>>.......<<<<.>>>>>.......<<<<<.....>>>>>.......<<<<<<<<<<<<.
AT1G15650.trna1	(1-82)	Length:	82	bp
Type:	Ser	Anticodon:	AGA	at	34-36	(34-36)	Score:	77
Seq:	GUGGACGUGCCGGAGUGGUUAUCGGGCAUGACUAGAAAUCAUGUGGGCUUUGCCCGCGCAGGUUCGAAUCCUGCCGUUCACG
Str:	>>>>>>>..>>>>........<<<<.>>>>>.......<<<<<.>>>>...<<<<..>>>>>.......<<<<<<<<<<<<.
AT1G16450.trna1	(1-73)	Length:	73	bp											1
Type:	Arg	Anticodon:	CCG	at	34-36	(34-36)	Score:	69.5
Seq:	GACCGCGUGGCCUAAUGGAUAAGGCGCUCGCCUCCGGAGCGGGAGAUUGUGGGUUCGAGUCCCACCGUGGUCG
Str:	>>>>>>>..>>>>........<<<<.>>>>>.......<<<<<.....>>>>>.......<<<<<<<<<<<<.
AT1G17570.trna1	(1-82)	Length:	82	bp
Type:	Ser	Anticodon:	AGA	at	34-36	(34-36)	Score:	80.5
Seq:	GUAGGCGUGCCGGAGUGGUUAUCGGGCAUGACUAGAAAUCAUGUGGGCUUUGCCCGCGCAGGUUCGAAUCCUGCCGCCUACG
Str:	>>>>>>>..>>>>........<<<<.>>>>>.......<<<<<.>>>>...<<<<..>>>>>.......<<<<<<<<<<<<.
AT1G18820.trna1	(1-81)	Length:	81	bp
Type:	Leu	Anticodon:	CAG	at	36-38	(36-38)	Score:	70.7
Seq:	GUCAAGAUGGCCGAGUUGGUcUAAGGCGCCAGUUUCAGGUACUGGUccgaaaGGgCGUGGGUUCAAAUCCCACUCUUGACA
Str:	>>>>>>>..>>>............<<<.>>>>>.......<<<<<...........>>>>>.......<<<<<<<<<<<<.
AT1G20040.trna1	(1-84)	Length:	84	bp
Type:	Leu	Anticodon:	CAA	at	35-37	(35-37)	Score:	82
Seq:	GUCAGGAUGGCCGAGUGGUcUAAGGCGCCAGACUCAAGUUCUGGUCCUCGUAAGAGGGCGUGGGUUCAAACCCCACUUCUGACA
Str:	>>>>>>>..>>>...........<<<.>>>>>.......<<<<<.>>>>....<<<<..>>>>>.......<<<<<<<<<<<<.
AT1G20210.trna1	(1-72)	Length:	72	bp
Type:	Asp	Anticodon:	GUC	at	34-36	(34-36)	Score:	71.4
Seq:	GUCGUUGUAGUAUAGUGGUaAGUAUUCCCGCCUGUCACGCGGGUGGCCCGGGUUCGAUCCCCGGCAACGGCG
Str:	>>>>>>>..>>>>........<<<<.>>>>>.......<<<<<....>>>>>.......<<<<<<<<<<<<.
AT1G20420.trna1	(1-72)	Length:	72	bp
Type:	Pro	Anticodon:	UGG	at	33-35	(33-35)	Score:	69.2
Seq:	GGGCGUUUGGUCUAGUGGUAUGAUUCUCGCUUUGGGUGCGAGAGGUCCCGAGUUCGAUUCUCGGAACGCCCC
Str:	>>>>>>>..>>>.........<<<.>>>>>.......<<<<<.....>>>>>.......<<<<<<<<<<<<.
AT1G20820.trna1	(1-72)	Length:	72	bp
Type:	Trp	Anticodon:	CCA	at	33-35	(33-35)	Score:	72.7
Seq:	GGAUUCGUGGCGCAAUGGUAGCGCGUCUGACUCCAGAUCAGAAGGUUGCGUGUUCGAUUCACGUCGGGUUCA
Str:	>>>>>>>..>>>>.......<<<<.>>>>>.......<<<<<.....>>>>>.......<<<<<<<<<<<<.
AT1G21420.trna1	(1-72)	Length:	72	bp
Type:	Gln	Anticodon:	UUG	at	34-36	(34-36)	Score:	73.5
Seq:	GGUUCUAUGGUGUAGUGGUUAGCACUCUGGACUUUGAAUCCAGCGaCCUGGGUUCGACUCCCGGUAGGACCU
Str:	>>>>>>>..>>>>........<<<<.>>>>>.......<<<<<....>>>>>.......<<<<<<<<<<<<.
AT1G26430.trna1	(1-74)	Length:	74	bp
Type:	Asn	Anticodon:	GUU	at	35-37	(35-37)	Score:	86.1
Seq:	GCUGGAAUAGCUCAGUUGGUUAGAGCGUGUGGCUGUUAACCACAAGGUCGGAGGUUCGAUCCCUCCUUCUAGCG
Str:	>>>>>>>..>>>>.........<<<<.>>>>>.......<<<<<.....>>>>>.......<<<<<<<<<<<<.
AT1G28720.trna1	(3-70)	Length:	68	bp
Type:	Pro	Anticodon:	UGG	at	31-33	(33-35)	Score:	45.8
Possible	UruncaUion
Seq:	GCAUUUGGUCUAGUGGUAUGAUUCUCGCUUUGGGUGCAAGAGGUCCCGAGUUCGAUUCUCGGAAUGCc
Str:	>>>>>..>>>.........<<<.>>.>>.......<<.<<.....>>>>>.......<<<<<<<<<<.
AT1G28730.trna1	(1-72)	Length:	72	bp
Type:	Pro	Anticodon:	AGG	at	33-35	(33-35)	Score:	33.3
Seq:	GGGCAUUUGGUCUAGUGGUAUGAUUCUUGCUUAGGGUGCGAGAGGCCCGgAGCUCAAUUCUCGGAAAACCCC
Str:	>>>..>>..>>>.........<<<.>>>>>.......<<<<<....>>>.>>.......<<<<<<<..<<<.
AT1G28740.trna1	(1-72)	Length:	72	bp
Type:	Pro	Anticodon:	UGG	at	33-35	(33-35)	Score:	68.5
Seq:	GGGCAUUUGGUCUAGUGGUAUGAUUCUCGCUUUGGGUGCGAGAGGUCCCGAGUUCGAUUCUCGGAAUGCCCC
Str:	>>>>>>>..>>>.........<<<.>>>>>.......<<<<<.....>>>>>.......<<<<<<<<<<<<.
AT1G28820.trna1	(1-72)	Length:	72	bp
Type:	Pro	Anticodon:	AGG	at	33-35	(33-35)	Score:	58.1
Seq:	UGGCAUUUGGUCUAGUGGUAUGAUUCUCGCUUAGGGUGCGAGAGGUCCCGAGUUCAAUUCUCGGAAUGCCCC
Str:	.>>>>>>..>>>.........<<<.>>>>>.......<<<<<.....>>>>>.......<<<<<<<<<<<..
AT1G28870.trna1	(1-72)	Length:	72	bp
Type:	Pro	Anticodon:	AGG	at	33-35	(33-35)	Score:	67.4
Seq:	GGGCAUUUGGUCUAGUGGUAUGAUUCUCGCUUAGGGUGCGAGAGGUCCCGAGUUCAAUUCUCGGAAUGCCCC
Str:	>>>>>>>..>>>.........<<<.>>>>>.......<<<<<.....>>>>>.......<<<<<<<<<<<<.
AT1G28990.trna1	(1-72)	Length:	72	bp
Type:	Pro	Anticodon:	UGG	at	33-35	(33-35)	Score:	62.7
Seq:	GGGCAUUUGGUCUAGUGGUAUGAUUCUCGCUUUGGGUGCGAGAGGUCCCGAGUUCGAUUCUCGCAAUGCCCC
Str:	>>>>>>>..>>>.........<<<.>>>>>.......<<<<<......>>>>.......<<<<.<<<<<<<.
AT1G29210.trna1	(1-73)	Length:	73	bp
Type:	Glu	Anticodon:	CUC	at	35-37	(35-37)	Score:	76.3
Seq:	UCCGUUGUAGUCUAGCUGGUcAGGAUACUCGGCUCUCACCCGAGAGaCCCGGGUUCGAGUCCCGGCAACGGAG
Str:	>>>>>>>..>>>>.........<<<<.>>>>>.......<<<<<....>>>>>.......<<<<<<<<<<<<.
AT1G31110.trna1	(1-74)	Length:	74	bp
Type:	Ile	Anticodon:	AAU	at	35-37	(35-37)	Score:	86.4
Seq:	GGCCUAUUAGCUCAGUUGGUUAGAGCGUCGUGCUAAUAACGCGAAGGUCACAGGUUCGAUCCCUGUAUAGGCCA
Str:	>>>>>>>..>>>>.........<<<<.>>>>>.......<<<<<.....>>>>>.......<<<<<<<<<<<<.
AT1G36350.trna1	(1-73)	Length:	73	bp
Type:	Arg	Anticodon:	UCU	at	34-36	(34-36)	Score:	71
Seq:	GCGCCCGUGGCCUAAUGGAUAAGGCGUUUGACUUCUAAUCAAACGAUUGUGGGUUCGAGUCCCACCGGGCGUG
Str:	>>>>>>>..>>>>........<<<<.>>>>>.......<<<<<.....>>>>>.......<<<<<<<<<<<<.
AT1G42120.trna1	(1-72)	Length:	72	bp
Type:	iMeU	Anticodon:	CAU	at	33-35	(33-35)	Score:	55
Seq:	AUCAGAGUGGCGCAGCGGAAGCGUGGUGGGCCCAUAACCCACAGGUCCCAAGAUCGAAACUUGGCUCUGAUA
Str:	>>>>>>>..>>>>.......<<<<.>>>>>.......<<<<<.....>>>>>.......<<<<<<<<<<<<.
AT1G43820.trna1	(1-72)	Length:	72	bp
Type:	Asp	Anticodon:	GUC	at	34-36	(34-36)	Score:	63.9
Seq:	GUCGUUGUAGUAUAGUGGUaAGGAUUCCCGCCUGUCACGCGGGUGaCCCGGGUUCGAUCCUCGGCAACGACG
Str:	>>>>>>>..>>.>........<.<<.>>>>>.......<<<<<....>>>>>.......<<<<<<<<<<<<.
AT1G49280.trna1	(1-74)	Length:	74	bp
Type:	Thr	Anticodon:	AGU	at	35-37	(35-37)	Score:	70.2
Seq:	GCUCUCGUAGCUCAGUUGGUUAGAGCACCCGUUUAGUAAGCGGGAGGUCUUGAGUUCAACUCUCAACGAAAGCA
Str:	>>>.>>>..>>>>.........<<<<.>>>>>.......<<<<<.....>>>>>.......<<<<<<<<.<<<.
AT1G49460.trna1	(1-74)	Length:	74	bp
Type:	Tyr	Anticodon:	GUA	at	34-36	(34-36)	Score:	74.6
Seq:	CCGACCUUAGCUCAGUUGGUAGAGCGGAAGACUGUAGUAUCUUUAGGUCGCUGGUUCGAUUCCGGCAGGUCGGA
Str:	>>>>>>>..>>>>........<<<<.>>>>>........<<<<<.....>>>>>.......<<<<<<<<<<<<.
AT1G49690.trna1	(1-73)	Length:	73	bp
Type:	Arg	Anticodon:	CCU	at	34-36	(34-36)	Score:	74.8
Seq:	GCGCCUGUAGCUCAGUGGAUAGAGCGUCUGUUUCCUAAGCAGAAGGUCGUAGGUUCGACCCCUACCUGGCGCG
Str:	>>>>>.>..>>>>........<<<<.>>>>>.......<<<<<.....>>>>>.......<<<<<<.<<<<<.
AT1G50070.trna1	(1-80)	Length:	80	bp
Type:	Leu	Anticodon:	UAG	at	35-37	(35-37)	Score:	64.9
Seq:	GAUAGUUUGGCCGAGUGGUcUAAGGCGCCAGAUUUAGGCUCUGGUccgaaaGGgCGUGGGUUCAAAUCCCACAGCUGUCA
Str:	>>>>>>>..>>>...........<<<.>>>>>.......<<<<<...........>>>>>.......<<<<<<<<<<<<.
AT1G52170.trna1	(1-74)	Length:	74	bp
Type:	Asn	Anticodon:	GUU	at	35-37	(35-37)	Score:	81.4
Seq:	GCUGGAGUAGCUCAGUUGGUUAGAGCGUGUGGCUGUUAACCACAAGGUCAGAGGUUCGACCCCUCUCUCUAGCG
Str:	>>>>>>>..>>>>.........<<<<.>>>>>.......<<<<<.....>>>>>.......<<<<<<<<<<<<.
AT1G52860.trna1	(1-74)	Length:	74	bp
Type:	Tyr	Anticodon:	GUA	at	34-36	(34-36)	Score:	74.8
Seq:	CCGACCUUAGCUCAGUUGGUAGAGCGGAAGACUGUAGaAUCUUUAGGUCGCUGGUUCGAUUCCGGCAGGUCGGA
Str:	>>>>>>>..>>>>........<<<<.>>>>>........<<<<<.....>>>>>.......<<<<<<<<<<<<.
AT1G53410.trna1	(1-72)	Length:	72	bp
Type:	Cys	Anticodon:	GCA	at	33-35	(33-35)	Score:	80.8
Seq:	GGGUCCUUAGCUCAGUGGUAGAGCAAUUGACUGCAGAUCAAUAGGUCACCGGUUCGAAUCCGGUAGGGCCCU
Str:	>>>>>>>..>>>>.......<<<<.>>>>>.......<<<<<.....>>>>>.......<<<<<<<<<<<<.
AT1G55625.trna1	(1-82)	Length:	82	bp
Type:	Ser	Anticodon:	UGA	at	34-36	(34-36)	Score:	80.7
Seq:	GUCGAUAUGUCCGAGUGGUUAAGGAGACAGACUUGAAAUCUGUUGGGCUUCGCCCGCGCAGGUUCGAACCCUGCUGUCGACG
Str:	>>>>>>>..>>>..........<<<.>>>>>.......<<<<<.>>>>...<<<<..>>>>>.......<<<<<<<<<<<<.
AT1G56730.trna1	(1-82)	Length:	82	bp
Type:	Ser	Anticodon:	AGA	at	34-36	(34-36)	Score:	64.8
Seq:	GUGGAAGUGGCGGAGUGGUUAUCGGGCAUGACUAGAAAUCAUGUGGGCUUUGCCCGCGCAGGUUCGAAUCCUGCCGUUCACG
Str:	>>>>>.>...>>>........<<<..>>>>>.......<<<<<.>>>>...<<<<..>>>>>.......<<<<<<.<<<<<.
AT1G56740.trna1	(1-74)	Length:	74	bp
Type:	Tyr	Anticodon:	GUA	at	34-36	(34-36)	Score:	65
Seq:	CCGACCUUAGCUCAGUUGGUAGAGCGGAGGACUGUAGUAUCCUUAGGUCAUUGGUUCGAAUCCGCUAGGUCGGA
Str:	>>>>>>>..>>>>........<<<<.>>>>>........<<<<<.....>.>>>.......<<<.<<<<<<<<.
AT1G56750.trna1	(1-74)	Length:	74	bp
Type:	Tyr	Anticodon:	GUA	at	34-36	(34-36)	Score:	72.7
Seq:	CCGACCUUAGCUCAGUUGGUAGAGCGGAGGACUGUAGUAUCCUUAGGUCACUGGUUCGAAUCCGGUAGGUCGGA
Str:	>>>>>>>..>>>>........<<<<.>>>>>........<<<<<.....>>>>>.......<<<<<<<<<<<<.
AT1G56850.trna1	(1-82)	Length:	82	bp
Type:	Ser	Anticodon:	AGA	at	34-36	(34-36)	Score:	74.1
Seq:	GUGGACGUGCCGGAGUGGUUAUCGGGCAUGACUAGAAAUCAUGUGGGUUUUGCCCGCGCAGGUUCGAAUCCUGCCGUUCACG
Str:	>>>>>>>..>>>>........<<<<.>>>>>.......<<<<<..>>......<<..>>>>>.......<<<<<<<<<<<<.
AT1G56940.trna1	(1-82)	Length:	82	bp
Type:	Ser	Anticodon:	AGA	at	34-36	(34-36)	Score:	70.1
Seq:	GUGGACGUGCCGGAGUGGUUAUCGGGCAUAACUAGAAAUCAUGUGGGCUUUGCCCGCGCAGGUUCGAAUCCUGCCGUUCACG
Str:	>>>>>>>..>>>>........<<<<.>>>.>.......<.<<<.>>>>...<<<<..>>>>>.......<<<<<<<<<<<<.
AT1G56990.trna1	(1-74)	Length:	74	bp
Type:	Tyr	Anticodon:	GUA	at	34-36	(34-36)	Score:	54.5
Seq:	CCGACCUUAGCUCAGUUGGUAGAGCGGAGGACUGUAGUAUCCUUAGGUCACUGGUUCGAAUCUGGUAGGUUUGA
Str:	>.>>>>>..>>>>........<<<<.>>>>>........<<<<<.....>>>>>.......<<<<<<<<<<.<.
AT1G57150.trna1	(1-82)	Length:	82	bp
Type:	Ser	Anticodon:	AGA	at	34-36	(34-36)	Score:	50.6
Seq:	GUGGAAGUGCCGGAGUGGUUAUCGGGAAUGACUAGAAAUCAUGGGGGCUUUGCCCGCGCAGGUUUGAAUCUUGCCGUUUACG
Str:	>>>>>.>..>>>>........<<<<..>>>>.......<<<<..>>>>...<<<<..>>>>>.......<<<<<<.<<<<<.
AT1G57160.trna1	(1-74)	Length:	74	bp
Type:	Tyr	Anticodon:	GUA	at	34-36	(34-36)	Score:	69.3
Seq:	CCGACCUUAGCUCAGUUGGUAGAGCGGAGGACUGUAGUAUCCUUAGGUCAUUGGUUCGAAUCCGGUAGGUCGGA
Str:	>>>>>>>..>>>>........<<<<.>>>>>........<<<<<.....>>>>>.......<<<<<<<<<<<<.
AT1G57170.trna1	(1-74)	Length:	74	bp
Type:	Tyr	Anticodon:	GUA	at	34-36	(34-36)	Score:	61.5
Seq:	CCGACUUUAGCUCAGUUGGUAGAGCGGAGGACAGUAGaAUCCUUAGGUCACUGGUUCGAAUCCGGUAGGUCGGA
Str:	>>>>>>>..>>>>........<<<<.>>>>>........<<<<<.....>>>>>.......<<<<<<<<<<<<.
AT1G57190.trna1	(1-74)	Length:	74	bp
Type:	Tyr	Anticodon:	GUA	at	34-36	(34-36)	Score:	64.7
Seq:	CCGACCUUAGCUCAGUUGGUAGAGCGGAGGACUGUAGUAUCCUUAGGUCACUGGUUCGAAUUCGGUAGGUCGGA
Str:	>>>>>>>..>>>>........<<<<.>>>>>........<<<<<.....>>>>>.......<<<<<<<<<<<<.
AT1G57270.trna1	(1-82)	Length:	82	bp
Type:	Ser	Anticodon:	AGA	at	34-36	(34-36)	Score:	57.7
Seq:	GUGGACGUGCCGGAGUGGUUAUCGGGAAUGACUAGAAAUCAUGGGGGCUUUGCCCGCGCAGGUUUGAAUCUUGCCGUUUACG
Str:	>>>>>>>..>>>>........<<<<..>>>>.......<<<<..>>>>...<<<<..>>>>>.......<<<<<<<<<<<<.
AT1G57290.trna1	(1-74)	Length:	74	bp
Type:	Tyr	Anticodon:	GUA	at	34-36	(34-36)	Score:	57.6
Seq:	CCGACCUUAGCUCAGUUGGUAGAGCGGAGGACAGUAGaAUCCUUAGGUCACAGGUUCGAAUCCGGUAGGUCGGA
Str:	>>>>>>>..>>>>........<<<<.>>>>>........<<<<<.....>>.>>.......<<.<<<<<<<<<.
AT1G57310.trna1	(1-74)	Length:	74	bp
Type:	Tyr	Anticodon:	GUA	at	34-36	(34-36)	Score:	50.7
Seq:	CCAACCUUAGCUCAGUUGGUAGAGCGGAGGACUGUAGUAUCCUUAGGUCACUGGUUCGAAUUUGGUAGGUCGGA
Str:	>>.>>>>..>>>>........<<<<.>>>>>........<<<<<.....>>>>>.......<<<<<<<<<.<<.
AT1G57410.trna1	(1-74)	Length:	74	bp
Type:	Tyr	Anticodon:	GUA	at	34-36	(34-36)	Score:	54.3
Seq:	CCGACCUUAGCUCAGUUGGUAGAGCGGAGGACAGUAGaAUCCUUAGGUCAUAGGUUCGAAUCCGGUAGGUCGGA
Str:	>>>>>>>..>>>>........<<<<.>>>>>........<<<<<.....>>.>>.......<<.<<<<<<<<<.
AT1G57420.trna1	(1-82)	Length:	82	bp
Type:	Ser	Anticodon:	AGA	at	34-36	(34-36)	Score:	44.5
Seq:	GUGGACGUGCCGGAGUGGUUAUCGGGAAUGACUAGAAAUCAUGGAGGCUUUGCCCGCGCACGUUUGAAUCUUGCCGUUUACG
Str:	>>>>>>>..>>>>........<<<<..>>>>.......<<<<...>>>...<<<...>>>.>.......<.<<<<<<<<<<.
AT1G57450.trna1	(1-84)	Length:	84	bp
Type:	Ser	Anticodon:	AGA	at	36-38	(36-38)	Score:	51.7
Seq:	GUGGACAUGCCGGAGUGGUgUUAUCGGGCAUAACUAGAAAUCAUGUGGGCUUUGCCCGCGCAGGUUCGAAUCAUGCCGUUUACG
Str:	>>>>>>...>>>>..........<<<<.>>>.>.......<.<<<.>>>>...<<<<..>>>.>.......<.<<<.<<<<<<.
AT1G57460.trna1	(1-74)	Length:	74	bp
Type:	Tyr	Anticodon:	GUA	at	34-36	(34-36)	Score:	47.5
Seq:	CCGACCUUAGCUCUGUUGGUAUAGCGGAGGACUGUAGUAUCCUUAGGUCACUGGUUCGAAUUCGGUAGGUCGGA
Str:	>>>>>>>..>>>..........<<<.>>>>>........<<<<<.....>>>>>.......<<<<<<<<<<<<.
AT1G60840.trna1	(1-71)	Length:	71	bp
Type:	Gly	Anticodon:	GCC	at	33-35	(33-35)	Score:	62.1
Seq:	GCACCAGUGGUCUAGUGGUAGAAUAGUACUCUGCCACGGUACAGaCCCGGGUUCGAUUCCCGGCUGGUGCA
Str:	>>>>>>>..>>.>.......<.<<.>>>>>.......<<<<<....>>>>>.......<<<<<<<<<<<<.
AT1G60910.trna1	(1-71)	Length:	71	bp
Type:	Gly	Anticodon:	GCC	at	33-35	(33-35)	Score:	65.5
Seq:	GCACCAGUGGUCUAGUGGUAGAAUAGUACCCUGCCACGGUACAGaCCCGGGUUCAAUUCCCGGCUGGUGCA
Str:	>>>>>>>..>>.>.......<.<<.>>>>>.......<<<<<....>>>>>.......<<<<<<<<<<<<.
AT1G61910.trna1	(1-80)	Length:	80	bp
Type:	Leu	Anticodon:	UAG	at	35-37	(35-37)	Score:	68.7
Seq:	GACAAUUUGGCCGAGUGGUcUAAGGCGCCAGAUUUAGGCUCUGGUccgaaaGGgCGUGGGUUCAAAUCCCACAGUUGUCA
Str:	>>>>>>>..>>>...........<<<.>>>>>.......<<<<<...........>>>>>.......<<<<<<<<<<<<.
AT1G63510.trna1	(1-72)	Length:	72	bp
Type:	Cys	Anticodon:	GCA	at	33-35	(33-35)	Score:	80.1
Seq:	GGGCUCAUAGCUCAGUGGUAGAGCAUUCGACUGCAGAUCGAGAGGUCACCGGUUCGAACCCGGUUGGGCCCU
Str:	>>>>>>>..>>>>.......<<<<.>>>>>.......<<<<<.....>>>>>.......<<<<<<<<<<<<.
AT1G63790.trna1	(1-72)	Length:	72	bp
Type:	Thr	Anticodon:	UGU	at	33-35	(33-35)	Score:	84.3
Seq:	GCCCUUAUAGCUCAGUGGUAGAGCGUCAGUCUUGUAAACUGAAGGUCCGUAGUUCGAUCCUGCGUGAGGGCA
Str:	>>>>>>>..>>>>.......<<<<.>>>>>.......<<<<<.....>>>>>.......<<<<<<<<<<<<.
AT1G64120.trna1	(1-84)	Length:	84	bp
Type:	Leu	Anticodon:	CAA	at	35-37	(35-37)	Score:	79.5
Seq:	GUCAGGAUGGCCGAGUGGUcUAAGGCGCCAGACUCAAGUUCUGGUCUUCGAAagaGGgCGUGGGUUCAAAUCCCACUUCUGACA
Str:	>>>>>>>..>>>...........<<<.>>>>>.......<<<<<.>>>><<<...<...>>>>>.......<<<<<<<<<<<<.
AT1G64420.trna1	(1-73)	Length:	73	bp
Type:	Ala	Anticodon:	CGC	at	34-36	(34-36)	Score:	68.3
Seq:	GGGGGUGUAGCUCAUAUGGUAGAGCGCUCGCUUCGCAUGCGAGAGGcACGGGGUUCGAUUCCCCGCACCUCCA
Str:	>>>>>>>..>>>>........<<<<.>>>>>.......<<<<<.....>>>>>.......<<<<<<<<<<<<.
AT1G68950.trna1	(1-73)	Length:	73	bp
Type:	Phe	Anticodon:	GAA	at	34-36	(34-36)	Score:	58.4
Seq:	GCGGGGAUAGCUCAGUUGGGAGAGCGUGACACUGAAGAUCUGAAGGUCGCGUGUUCGAUCCACGCUCACCGCA
Str:	>>>>.>>..>>>>........<<<<.>.>.>.......<.<.<.....>>>>>.......<<<<<<<.<<<<.
AT1G69000.trna1	(1-72)	Length:	72	bp
Type:	iMeU	Anticodon:	CAU	at	33-35	(33-35)	Score:	58.3
Seq:	AUCAGAGUGGCGCAGCGGAAGCGUGGUGGGCCCAUAACCCACAGGUCCCAGGAUCGAAACCUGGCUCUGAUA
Str:	>>>>>>>..>>>>.......<<<<.>>>>>.......<<<<<.....>>>>>.......<<<<<<<<<<<<.
AT1G69300.trna1	(1-74)	Length:	74	bp
Type:	Asn	Anticodon:	GUU	at	35-37	(35-37)	Score:	83.3
Seq:	GCUGGAAUAGCUCAGUUGGUUAGAGCGUGUGGCUGUUAACCACAAGGUCGGAGGUUCGACCCCUCCUUCUAGCG
Str:	>>>>>>>..>>>>.........<<<<.>>>>>.......<<<<<.....>>>>>.......<<<<<<<<<<<<.
AT1G70050.trna1	(1-72)	Length:	72	bp
Type:	Pro	Anticodon:	AGG	at	33-35	(33-35)	Score:	65.2
Seq:	GGGCAUUUGGUCUAGUGGUAUGAUUCUCGCUUAGGGUGCGAGAGGUCCGGAGUUCAAUUCUCCGAAUGCCCC
Str:	>>>>>>>..>>>.........<<<.>>>>>.......<<<<<.....>>>>>.......<<<<<<<<<<<<.
AT1G71700.trna1	(1-71)	Length:	71	bp
Type:	Gly	Anticodon:	GCC	at	33-35	(33-35)	Score:	67.5
Seq:	GCACCAGUGGUCUAGUGGCAUGAUAGUACCCUGCCACGGUACAGaCCCGGGUUCAAUUCCCGGCUGGUGCA
Str:	>>>>>>>..>>>.........<<<.>>>>>.......<<<<<....>>>>>.......<<<<<<<<<<<<.
AT1G74570.trna1	(1-81)	Length:	81	bp
Type:	Leu	Anticodon:	AAG	at	36-38	(36-38)	Score:	71.4
Seq:	GUUGAUAUGGCCGAGUUGGUcUAAGGCGCCAGAUUAAGGUUCUGGUccgaaaGGgCGUGGGUUCAAAUCCCACUGUCAACA
Str:	>>>>>>>..>>>............<<<.>>>>>.......<<<<<...........>>>>>.......<<<<<<<<<<<<.
AT1G75970.trna1	(1-72)	Length:	72	bp
Type:	Glu	Anticodon:	UUC	at	34-36	(34-36)	Score:	70.4
Seq:	UCCGUUAUCGUCCAGCGGUUAGGAUAUCUGGCUUUCACCCAGGAGaCCCGGGUUCGAUUCCCGGUAACGGAG
Str:	>>>>>>>..>>>>........<<<<.>>>>>.......<<<<<....>>>>>.......<<<<<<<<<<<<.
AT1G76330.trna1	(1-82)	Length:	82	bp
Type:	Ser	Anticodon:	UGA	at	34-36	(34-36)	Score:	79.6
Seq:	GUCAAUAUGUCCGAGUGGUUAAGGAGAUAGACUUGAAAUCUAUUGGGCUUCGCCCGCGCAGGUUCGAACCCUGCUGUUGACG
Str:	>>>>>>>..>>>..........<<<.>>>>>.......<<<<<.>>>>...<<<<..>>>>>.......<<<<<<<<<<<<.
AT1G77190.trna1	(1-82)	Length:	82	bp
Type:	Ser	Anticodon:	GCU	at	34-36	(34-36)	Score:	79.9
Seq:	GUCGCUUUGGCCGAGUGGUUAAGGCGUGUGCCUGCUAAGUACAUGGGCUCUGCCCGCGAGAGUUCGAAUCUCUCAGGCGACG
Str:	>>>>>>>..>>>..........<<<.>>>>>.......<<<<<.>>>>...<<<<..>>>>>.......<<<<<<<<<<<<.
AT1G79290.trna1	(1-72)	Length:	72	bp
Type:	Lys	Anticodon:	UUU	at	33-35	(33-35)	Score:	92.3
Seq:	GCCGUCUUAGCUCAGUGGUAGAGCGCGUGGCUUUUAACCACGUGGcCGUGGGUUCGAUCCCCACAGACGGCG
Str:	>>>>>>>..>>>>.......<<<<.>>>>>.......<<<<<.....>>>>>.......<<<<<<<<<<<<.
AT1G79980.trna1	(1-74)	Length:	74	bp
Type:	Arg	Anticodon:	UCG	at	35-37	(35-37)	Score:	82.3
Seq:	GACCGCAUAGCGCAGUGGAUUAGCGCGUUUGACUUCGGAUCAAAAGGUCGUGGGUUCGACUCCCACUGUGGUCG
Str:	>>>>>>>..>>>>.........<<<<.>>>>>.......<<<<<.....>>>>>.......<<<<<<<<<<<<.
AT2G03660.trna1	(1-72)	Length:	72	bp
Type:	Thr	Anticodon:	CGU	at	33-35	(33-35)	Score:	73.4
Seq:	GCCUCCGUAGCAUAGUGGUAUUGCGUUCGCUUCGUAAGCGAAAGGUCGUGAGUUCGAUCCUCACCGUAGGCU
Str:	>>>>.>>..>>>.........<<<.>>>>>.......<<<<<.....>>>>>.......<<<<<<<.<<<<.
AT2G03700.trna1	(1-72)	Length:	72	bp
Type:	Thr	Anticodon:	CGU	at	33-35	(33-35)	Score:	80.4
Seq:	GCCUCUGUAGCAUAGUGGUAUUGCGUUCGCUUCGUAAGCGAAAGGcCGCGAGUUCGAUCCUCGCCGGAGGCU
Str:	>>>>>>>..>>>.........<<<.>>>>>.......<<<<<.....>>>>>.......<<<<<<<<<<<<.
AT2G07743.trna1	(1-74)	Length:	74	bp
Type:	Asp	Anticodon:	GUC	at	35-37	(35-37)	Score:	61.5
Seq:	GGGAUUGUAGUUCAAUCGGUcAGAGCACCGCCCUGUCAAGGCGGAAGcUGCGGGUUCGAGCCCCGUCAGUCCCG
Str:	>>>>>>>..>>>>.........<<<<.>>>>>.......<<<<<.....>>>>>.......<<<<<<<<<<<<.
AT2G07745.trna1	(12-76)	Length:	65	bp
Type:	Tyr	Anticodon:	GUA	at	30-32	(41-43)	Score:	38.5
Seq:	GGUAGCUCAGAUGGUUAGAGCAAAGGACUGUAAAUCCUUGUGUUAGUGGUUCGAUUCCACAACCA
Str:	>>..>>>>.........<<<<.>>>>>.......<<<<<......>>>>.......<<<<..<<.
AT2G07746.trna1	(1-72)	Length:	72	bp
Type:	Gln	Anticodon:	UUG	at	33-35	(33-35)	Score:	52.4
Seq:	UGGAGUAUAGCCAAGUGGUAAGGCACCGGUUUUUGGUACCGGCAUgCAAAGGUUCGAAUCCUUUUACUCCAG
Str:	>>>>>>>..>>>.........<<<.>>>>>.......<<<<<.....>>>>>.......<<<<<<<<<<<<.
AT2G07748.trna1	(1-74)	Length:	74	bp
Type:	Trp	Anticodon:	CCA	at	35-37	(35-37)	Score:	72.3
Seq:	GCGCUCUUAGUUCAGUUcGGUAGAACGUGGGUCUCCAAAACCCAAUGUCGUAGGUUCAAAUCCUACAGAGCGUG
Str:	>>>>>>>..>>>>.........<<<<.>>>>>.......<<<<<.....>>>>>.......<<<<<<<<<<<<.
AT2G07752.trna1	(1-72)	Length:	72	bp
Type:	Glu	Anticodon:	UUC	at	34-36	(34-36)	Score:	60.2
Seq:	GUCCCUUUCGUCCAGUGGUUAGGACAUCGUCUUUUCAUGUCGAAGaCACGGGUUCGAUUCCCGUAAGGGAUA
Str:	>>>>>>>..>>>>........<<<<.>>>.>.......<.<<<....>>>>>.......<<<<<<<<<<<<.
AT2G07753.trna1	(1-75)	Length:	75	bp
Type:	Tyr	Anticodon:	GUA	at	36-38	(36-38)	Score:	49.2
Seq:	AAGUGGUUcAGCUCAGCUGGUUAGAGCAAAGGACUGUAAAUCCUUGUGUCAGUGGUUCGAAUCCACAACCACUUC
Str:	>>>>>>>...>>>>.........<<<<.>>>>>.......<<<<<......>>>>.......<<<<.<<<<<<<.
AT2G07754.trna1	(1-88)	Length:	88	bp
Type:	Ser	Anticodon:	GCU	at	35-37	(35-37)	Score:	46
Seq:	GGAGGGAUGGCUGAGUGGCUUAAGGCAUUGGUUUGCUAAAUCGACAUACAaGAAGAUUGUAUCAUGGGUUCGAAUCCCAUUUCCUCCG
Str:	>>>>>>>..>>>...........<<<.>>>>>.......<<<<<.>>>>>.......<<<<<.>>>>>.......<<<<<<<<<<<<.
AT2G07755.trna1	(1-73)	Length:	73	bp
Type:	MeU	Anticodon:	CAU	at	34-36	(34-36)	Score:	54.9
Seq:	ACCUACUUGACUCAGCGGUUAGAGUAUCGCUUUCAUACGGCGAGAGUCAUUGGUUCAAAUCCAAUAGUAGGUA
Str:	>>>>>>>..>>>>........<<<<.>>>>>.......<<<<<.....>>>>>.......<<<<<<<<<<<<.
AT2G07756.trna1	(1-72)	Length:	72	bp
Type:	Gly	Anticodon:	GCC	at	33-35	(33-35)	Score:	64.4
Seq:	GCGGAAAUAGCUUAAUGGUAGAGCAUAGCCUUGCCAAGGCUAAGGUUGAGGGUUCAAGUCCCUCCUUCCGCU
Str:	>>>>>>...>>>>.......<<<<.>>>>>.......<<<<<.....>>>>>.......<<<<<.<<<<<<.
AT2G07757.trna1	(1-87)	Length:	87	bp
Type:	Ser	Anticodon:	GGA	at	35-37	(35-37)	Score:	64.5
Seq:	GGAGAGAUGGCCGAGUGGUUUAAGGCGUAGCAUUGGAACUGCUAUGUAGGCUUUUgUUUAcCGAGGGUUCGAAUCCCUCUCUUUCCG
Str:	>>>>>>>..>>>...........<<<.>>>>>.......<<<<<...>>.......<<....>>>>>.......<<<<<<<<<<<<.
AT2G07758.trna1	(1-74)	Length:	74	bp
Type:	MeU	Anticodon:	CAU	at	35-37	(35-37)	Score:	60.5
Seq:	AGCGGGGUAGAGGAAUUGGUcAACUCAUCAGGCUCAUGACCUGAAGAUUACAGGUUCGAAUCCUGUCCCCGCAU
Str:	.>>>>>>..>>>...........<<<.>>>>>.......<<<<<.....>>>>>.......<<<<<<<<<<<..
AT2G07762.trna1	(1-75)	Length:	75	bp
Type:	Pro	Anticodon:	UGG	at	36-38	(36-38)	Score:	62.8
Seq:	CGAGGUGUAGCGCAGUCUGGUcAGCGCAUCUGUUUUGGGUACAGAGGGcCAUAGGUUCGAAUCCUGUCACCUUGA
Str:	>>>>>>>..>>>>..........<<<<.>>>>>.......<<<<<.....>>>>>.......<<<<<<<<<<<<.
AT2G07763.trna1	(1-71)	Length:	71	bp
Type:	Cys	Anticodon:	GCA	at	33-35	(33-35)	Score:	48.1
Seq:	GGCUAGGUAACAUAAUGGAAAUGUAUCGGACUGCAAAUCCUGUAaUGACGGUUCGACUCCGUCCUUGGCCU
Str:	>>>>>>>..>>>>.......<<<<.>.>>>.......<<<.<....>>>>>.......<<<<<<<<<<<<.
AT2G07764.trna1	(1-72)	Length:	72	bp
Type:	Asn	Anticodon:	GUU	at	33-35	(33-35)	Score:	77.9
Seq:	UCCUCAGUAGCUCAGUGGUAGAGCGGUCGGCUGUUAACUGAUUGGUCGUAGGUUCAAAUCCUACUUGGGGAG
Str:	>>>>>>>..>>>>.......<<<<.>>>>>.......<<<<<.....>>>>>.......<<<<<<<<<<<<.
AT2G07765.trna1	(1-83)	Length:	83	bp
Type:	Tyr	Anticodon:	GUA	at	35-37	(35-37)	Score:	63.5
Seq:	GGGAGAGUGGCCGAGUGGUcaAAAGCGGCAGACUGUAAAUCUGUUGAAGUUUUUCUACGUAGGUUCGAAUCCUGCCUCUCCCA
Str:	>>>>>>>..>>.............<<.>>>>>.......<<<<<..>.>....<.<..>>>>>.......<<<<<<<<<<<<.
AT2G07766.trna1	(1-87)	Length:	87	bp
Type:	Ser	Anticodon:	UGA	at	35-37	(35-37)	Score:	61.3
Seq:	GGAUGGAUGUCUGAGCGGUUgAAAGAGUCGGUCUUGAAAACCGAAGUAUUUCUAGGAAUACCGGGGGUUCGAAUCCCUCUCCAUCCG
Str:	>>>>>>>..>>>...........<<<.>>>>>.......<<<<<.>>>>>>....<<<<<<.>>>>>.......<<<<<<<<<<<<.
AT2G07794.trna1	(1-74)	Length:	74	bp
Type:	MeU	Anticodon:	CAU	at	35-37	(35-37)	Score:	47.7
Seq:	GGGCUUAUAGUUUAAUUGGUUGAAACGUACCGCUCAUAACGGUUAUAUUGUAGGUUCGAGCCCUACUAAGCCUA
Str:	>>>>>>>..>>>>.........<<<<..>>>>.......<<<<......>>>>>.......<<<<<<<<<<<<.
AT2G16240.trna1	(1-72)	Length:	72	bp
Type:	Gln	Anticodon:	CUG	at	34-36	(34-36)	Score:	71.1
Seq:	GGUUCUAUGGUCUAGCGGUUAGGACAUUGGACUCUGAAUCCAGUAaCCCGAGUUCAAUUCUCGGUAGAACCU
Str:	>>>>>>>..>>>>........<<<<.>>>>>.......<<<<<....>>>>>.......<<<<<<<<<<<<.
AT2G21360.trna1	(1-72)	Length:	72	bp
Type:	Pro	Anticodon:	CGG	at	33-35	(33-35)	Score:	68.2
Seq:	GGGUGUUUGGUCUAGUGGUAUGAUUCUCGCUUCGGGUGCGAGAGGUCCCGAGUUCGAUUCUCGGAACACCCC
Str:	>>>>>>>..>>>.........<<<.>>>>>.......<<<<<.....>>>>>.......<<<<<<<<<<<<.
AT2G21570.trna1	(1-74)	Length:	74	bp
Type:	Tyr	Anticodon:	GUA	at	34-36	(34-36)	Score:	74.7
Seq:	CCGACCUUAGCUCAGUUGGUAGAGCGGAAGACUGUAGgAUCUUUAGGUCGCUGGUUCGAUUCCGGCAGGUCGGA
Str:	>>>>>>>..>>>>........<<<<.>>>>>........<<<<<.....>>>>>.......<<<<<<<<<<<<.
AT2G22110.trna1	(1-74)	Length:	74	bp
Type:	Val	Anticodon:	CAC	at	35-37	(35-37)	Score:	81.5
Seq:	GUCUGGGUGGUGUAGUCGGUUAUCACGCUAGUCUCACACACUAGAGGUCCCCGGUUCGAACCCGGGCUCAGACA
Str:	>>>>>>>..>>>...........<<<.>>>>>.......<<<<<.....>>>>>.......<<<<<<<<<<<<.
AT2G22280.trna1	(1-73)	Length:	73	bp
Type:	Arg	Anticodon:	ACG	at	34-36	(34-36)	Score:	72.9
Seq:	GACUCCAUGGCCCAAUGGAUAAGGCGCUGGUCUACGAAACCAGAGAcUCUGGGUUCGAUCCCCAGUGGAGUCG
Str:	>>>>>>>..>>>..........<<<.>>>>>.......<<<<<.....>>>>>.......<<<<<<<<<<<<.
AT2G22580.trna1	(1-73)	Length:	73	bp
Type:	Ala	Anticodon:	CGC	at	34-36	(34-36)	Score:	63.8
Seq:	GGGGGUGUAGCUCAUAUGGUAGAGCGCUCGUUUCGCAUGCGAGAGGcACGGGGUUCGAUUCCCCGCACCUCCA
Str:	>>>>>>>..>>>>........<<<<.>>>>>.......<<<<<.....>>>>>.......<<<<<<<<<<<<.
AT2G24380.trna1	(1-73)	Length:	73	bp
Type:	Arg	Anticodon:	ACG	at	34-36	(34-36)	Score:	72.5
Seq:	GACUCUGUGGCCCAAUGGAUAAGGCGCUGGUCUACGAAACCAGAGAUUCUGGGUUCGAUCCCCAGCAGAGUCG
Str:	>>>>>>>..>>>..........<<<.>>>>>.......<<<<<.....>>>>>.......<<<<<<<<<<<<.
AT2G25400.trna1	(1-73)	Length:	73	bp											1
Type:	Arg	Anticodon:	UCU	at	34-36	(34-36)	Score:	71.3
Seq:	GCACCCAUGGCCUAAUGGAUAAGGCGCUUGACUUCUAAUCAAGCGAUUGUGGGUUCGAAUCCCACUGGGUGUG
Str:	>>>>>>>..>>>>........<<<<.>>>>>.......<<<<<.....>>>>>.......<<<<<<<<<<<<.
AT2G28770.trna1	(1-72)	Length:	72	bp
Type:	His	Anticodon:	GUG	at	34-36	(34-36)	Score:	56.8
Seq:	GUGGCUGUAGUUUAGUGGUUAGAAUCCCACGUUGUGGCCGUGGGGaCCUGGGCUCGAAUCCCAGCAGCCACA
Str:	>>>>>>>..>>>>........<<<<.>>>>>.......<<<<<....>>>>>.......<<<<<<<<<<<<.
AT2G30850.trna1	(1-73)	Length:	73	bp
Type:	Ala	Anticodon:	AGC	at	34-36	(34-36)	Score:	61
Seq:	GGGGAUGUAGCUCAAAUGGUAGAGCGCUCGCUUAGCAUGCGAGAGGUACGGGGAUCGAUACCCCGCAUCUCCA
Str:	>>>>>>>..>>>>........<<<<.>>>>>.......<<<<<.....>>>>>.......<<<<<<<<<<<<.
AT2G32110.trna1	(1-75)	Length:	75	bp
Type:	Asn	Anticodon:	GUU	at	36-38	(36-38)	Score:	73.3
Seq:	GCUGGAAUAGCUCAGUAGGUUUAGAGCGUGUGGCUGUUAACCUCAAGGUCGGAGGUUCGACCCCUCCUUUCAGCG
Str:	>>>>>>>..>>>>..........<<<<.>>.>>.......<<.<<.....>>>>>.......<<<<<<<<<<<<.
AT2G33650.trna1	(1-72)	Length:	72	bp
Type:	Asp	Anticodon:	GUC	at	34-36	(34-36)	Score:	61.7
Seq:	GUCGUUGUAGUAUAGUGGUaAGUAUUCCCGCCUGUCACGCGGGUGaCCCGGGUUCGAUCCCCGGCAAAGGCG
Str:	>>>.>>>..>>>>........<<<<.>>>>>.......<<<<<....>>>>>.......<<<<<<<<.<<<.
AT2G33950.trna1	(1-72)	Length:	72	bp
Type:	Pro	Anticodon:	CGG	at	33-35	(33-35)	Score:	65.9
Seq:	GGGCAUUUGGUCUAGUGGUAUGAUUCUCGCUUCGGGUGCGAGGGGUCCCGAGUUCGAUUCUCGGAAUGCCCC
Str:	>>>>>>>..>>>.........<<<.>>>>>.......<<<<<.....>>>>>.......<<<<<<<<<<<<.
AT2G34950.trna1	(1-74)	Length:	74	bp
Type:	Thr	Anticodon:	AGU	at	35-37	(35-37)	Score:	73.6
Seq:	GCUUUCAUAGCUCAGUUGGUUAGAGCACCCGUUUAGUAAGCGGGAGGUCUUGAGUUCAACUCUCAAUGAAAGCA
Str:	>>>>>>>..>>>>.........<<<<.>>>>>.......<<<<<.....>>>>>.......<<<<<<<<<<<<.
AT2G34985.trna1	(1-71)	Length:	71	bp
Type:	UndeU	Anticodon:	NNN	at	0-0	(0-0)	Score:	26.1
Possible	pseudogene
Seq:	CUUAGGAUGGCCGAGUGGAcacAAGUUCUGGUCCUCGUAAGAGGgUGUGGGUUCAAACCCCACUUCUGACA
Str:	.>>>>>>..>.>............<.<.>...........<.....>>>>>.......<<<<<<<<<<<..
AT2G36510.trna1	(1-83)	Length:	83	bp
Type:	Leu	Anticodon:	UAA	at	34-36	(34-36)	Score:	72.9
Seq:	GCAGGUUUGCCCGAGUGGUUAAGGGGGAAGACUUAAGUUCUUCUGCACAUAAGUGCGCGUGGGUUCGAACCCCACAGCCUGCA
Str:	>>>>>>>..>>>..........<<<.>>>>>.......<<<<<.>>>>....<<<<..>>>>>.......<<<<<<<<<<<<.
AT2G38030.trna1	(1-73)	Length:	73	bp
Type:	Glu	Anticodon:	CUC	at	35-37	(35-37)	Score:	76.3
Seq:	UCCGUUGUAGUCUAGCUGGUUAGGAUACUCGGCUCUCACCCGAGAGaCCCGGGUUCGAGUCCCGGCAACGGAG
Str:	>>>>>>>..>>>>.........<<<<.>>>>>.......<<<<<....>>>>>.......<<<<<<<<<<<<.
AT2G39600.trna1	(1-72)	Length:	72	bp
Type:	Cys	Anticodon:	GCA	at	33-35	(33-35)	Score:	79.1
Seq:	GAGCCUAUAGCUCAGUGGUAGAGCAAUUGACUGCAGAUCAAUAGGUCACCGGUUCGAAUCCGGUUGGGCUCU
Str:	>>>>>>>..>>>>.......<<<<.>>>>>.......<<<<<.....>>>>>.......<<<<<<<<<<<<.
AT2G42020.trna1	(1-82)	Length:	82	bp
Type:	Ser	Anticodon:	GCU	at	34-36	(34-36)	Score:	81.7
Seq:	GUCGCUUUGGCCGAGUGGUUAAGGCGUUUGCCUGCUAAGUAAAUGGGGUUUCCCCGCGAGAGUUCGAAUCUCUCAGGCGACG
Str:	>>>>>>>..>>>..........<<<.>>>>>.......<<<<<.>>>>...<<<<..>>>>>.......<<<<<<<<<<<<.
AT2G43300.trna1	(1-72)	Length:	72	bp
Type:	Thr	Anticodon:	UGU	at	33-35	(33-35)	Score:	74.3
Seq:	GCCCGUAUAGCUCAGUGGUAGAGCGUCAGUCUUGUAAACUGAAGGUCCGUAGUUCUAUCCUGCGUGUGGGCA
Str:	>>>>>>>..>>>>.......<<<<.>>>>>.......<<<<<.....>>>>>.......<<<<<<<<<<<<.
AT2G44320.trna1	(1-82)	Length:	82	bp
Type:	Ser	Anticodon:	GCU	at	34-36	(34-36)	Score:	80.5
Seq:	GUCGCUUUGGCCGAGUGGUUAAGGCGUGUGCCUGCUAAGUACAUGGGGUUUCCCCGCGAGAGUUCGAAUCUCUCAGGCGACG
Str:	>>>>>>>..>>>..........<<<.>>>>>.......<<<<<.>>>>...<<<<..>>>>>.......<<<<<<<<<<<<.
AT2G45020.trna1	(1-73)	Length:	73	bp											1
Type:	Arg	Anticodon:	UCU	at	34-36	(34-36)	Score:	69.1
Seq:	GCACCCGUGGCCUAAUGGAUAAGGCGUUUGACUUCUAAUCAAGCGAUUGUGGGUUCGAGUCCCACCGGGUGUG
Str:	>>>>>>>..>>>>........<<<<.>>>>>.......<<<<<.....>>>>>.......<<<<<<<<<<<<.
AT2G47740.trna1	(1-71)	Length:	71	bp
Type:	Gly	Anticodon:	CCC	at	33-35	(33-35)	Score:	65.4
Seq:	GCGCAUCUGGUGUAGUGGUAUCAUAGUACCCUCCCACGGUACUGaCCAGGGUUCGAUUCCCUGGAUGCGCA
Str:	>>>>>>>..>>>.........<<<.>>>>>.......<<<<<....>>>>>.......<<<<<<<<<<<<.
AT3G02715.trna1	(1-82)	Length:	82	bp
Type:	Ser	Anticodon:	AGA	at	34-36	(34-36)	Score:	76.3
Seq:	GUGGACGUGCCGGAGUGGUUAUCGGGCAUGACUAGAAAUCAUGUGGGCUCUGCCCGCGCAGGUUCGAAUCCUGCCGUUCACG
Str:	>>>>>>>..>>>>........<<<<.>>>>>.......<<<<<.>>>>...<<<<..>>>>>.......<<<<<<<<<<<<.
AT3G04525.trna1	(1-73)	Length:	73	bp											1
Type:	Arg	Anticodon:	CCG	at	34-36	(34-36)	Score:	67.3
Seq:	GUUUGCGUGGCCUAAUGGAUAAGGCGCUCGCCUCCGAAGCGGGAGAUUGUGGGUUCGAAUCCCAUCGCGAACG
Str:	>>>>>>>..>>>>........<<<<.>>>>>.......<<<<<.....>>>>>.......<<<<<<<<<<<<.
AT3G05525.trna1	(1-72)	Length:	72	bp
Type:	Glu	Anticodon:	UUC	at	34-36	(34-36)	Score:	70.8
Seq:	UCCGUUGUCGUCCAGCGGUUAGGAUAUCUGGCUUUCACCCAGGAGaCCCGGGUUCGAUUCCCGGCAACGGAG
Str:	>>>>>>>..>>>>........<<<<.>>>>>.......<<<<<....>>>>>.......<<<<<<<<<<<<.
AT3G05755.trna1	(1-72)	Length:	72	bp
Type:	Pro	Anticodon:	CGG	at	33-35	(33-35)	Score:	67
Seq:	GGGUGUUUGGUCUAGUGGUAUGAUUCGCGCUUCGGGUGCGCGAGGUCCCGAGUUCGAUUCUCGGAACACCCC
Str:	>>>>>>>..>>>.........<<<.>>>>>.......<<<<<.....>>>>>.......<<<<<<<<<<<<.
AT3G05835.trna1	(1-74)	Length:	74	bp
Type:	Ile	Anticodon:	UAU	at	35-37	(35-37)	Score:	82.3
Seq:	GCUCCCGUAGCUCAGUUGGUUAGAGCGUUGGUCUUAUGAGCCGAAGGUCGCGGGUUCGAGCCCCGCCGGAAGCA
Str:	>>>.>>>..>>>>.........<<<<.>>>>>.......<<<<<.....>>>>>.......<<<<<<<<.<<<.
AT3G06105.trna1	(1-71)	Length:	71	bp
Type:	Gly	Anticodon:	GCC	at	33-35	(33-35)	Score:	57.8
Seq:	GCACCAGUGGUCUAGUGGUAGAAUAGAACCCUGCCACGGUACAGaCCCGGGUUCGAUUCCCGGCUGGUGCA
Str:	>>>>>>>..>>.>.......<.<<.>.>>>.......<<<.<....>>>>>.......<<<<<<<<<<<<.
AT3G07055.trna1	(1-75)	Length:	75	bp
Type:	MeU	Anticodon:	CAU	at	35-37	(35-37)	Score:	65.4
Seq:	GGGGUGGUGGCGCAGUUGGCUAGCGCGUAGGUCUCAUAaAUCCUGAGGUCGAGAGUUCGAGCCUCUCUCACCCCA
Str:	>>>>>>>..>>>>.........<<<<.>>>>..........<<<<.....>>>>>.......<<<<<<<<<<<<.
AT3G07115.trna1	(1-82)	Length:	82	bp
Type:	Ser	Anticodon:	UGA	at	34-36	(34-36)	Score:	79.2
Seq:	GUCAAUAUGUCCGAGUGGUUAAGGAGACAGACUUGAAAUCUGUUGGGCUUCGCCCGCGCAGGUUCGAACCCUGCUGUUGACG
Str:	>>>>>>>..>>>..........<<<.>>>>>.......<<<<<.>>>>...<<<<..>>>>>.......<<<<<<<<<<<<.
AT3G07185.trna1	(1-72)	Length:	72	bp
Type:	Lys	Anticodon:	UUU	at	33-35	(33-35)	Score:	89.8
Seq:	GCCGUCUUAGCUCAGCGGUAGAGCGCGUGGCUUUUAACCACGUGGcCGUGGGUUCGAUCCCCACAGACGGCG
Str:	>>>>>>>..>>>>.......<<<<.>>>>>.......<<<<<.....>>>>>.......<<<<<<<<<<<<.
AT3G09585.trna1	(1-82)	Length:	82	bp
Type:	Ser	Anticodon:	CGA	at	34-36	(34-36)	Score:	82
Seq:	GUCAAUAUGUCCGAGUGGUUAAGGAGAUUGACUCGAAAUCAAUUGGGCUUUGCCCGCGCAGGUUCGAAUCCUGCUGUUGACG
Str:	>>>>>>>..>>>..........<<<.>>>>>.......<<<<<.>>>>...<<<<..>>>>>.......<<<<<<<<<<<<.
AT3G09595.trna1	(1-82)	Length:	82	bp
Type:	Ser	Anticodon:	UGA	at	34-36	(34-36)	Score:	81.1
Seq:	GUCGAUAUGUCCGAGUGGUUAAGGAGAUAGACUUGAAAUCUAUUGGGCUUCGCCCGCGCAGGUUCGAACCCUGCUGUCGACG
Str:	>>>>>>>..>>>..........<<<.>>>>>.......<<<<<.>>>>...<<<<..>>>>>.......<<<<<<<<<<<<.
AT3G10015.trna1	(1-83)	Length:	83	bp
Type:	Leu	Anticodon:	UAA	at	34-36	(34-36)	Score:	67.5
Seq:	GCAGGUUUGCCCGAGAGGUUAAGGGGGAAGACUUAAGUUCUUCUGCACAUAAGUGCGCGUGGGUUCGAACCCCACAGCCUGCA
Str:	>>>>>>>..>>>..........<<<.>>>>>.......<<<<<.>>>>....<<<<..>>>>>.......<<<<<<<<<<<<.
AT3G10035.trna1	(1-73)	Length:	73	bp											1
Type:	Arg	Anticodon:	UCU	at	34-36	(34-36)	Score:	71.3
Seq:	GCACCCGUGGCCUAAUGGAUAAGGCGUUUGACUUCUAAUCAAACGAUUGUGGGUUCGAGUCCCACCGGGUGUG
Str:	>>>>>>>..>>>>........<<<<.>>>>>.......<<<<<.....>>>>>.......<<<<<<<<<<<<.
AT3G10415.trna1	(1-74)	Length:	74	bp
Type:	Tyr	Anticodon:	GUA	at	34-36	(34-36)	Score:	68.6
Seq:	CCGACCUUAGCUCAGUUGGUAGAGCGGAAGACUGUAAaAUCUUUAGGUCGCUGGUUCGAUUCCGGCAGGUUGAA
Str:	.>>>>>>..>>>>........<<<<.>>>>>........<<<<<.....>>>>>.......<<<<<<<<<<<..
AT3G11395.trna1	(1-74)	Length:	74	bp
Type:	Val	Anticodon:	CAC	at	35-37	(35-37)	Score:	81.2
Seq:	GUCUGGGUAGUGUAGUCGGUUAUCACGCUAGUCUCACACACUAGAGGUCCCCGGUUCGAACCCGGGCUCAGACA
Str:	>>>>>>>..>>>...........<<<.>>>>>.......<<<<<.....>>>>>.......<<<<<<<<<<<<.
AT3G12585.trna1	(1-73)	Length:	73	bp
Type:	Arg	Anticodon:	CCG	at	34-36	(34-36)	Score:	83.1
Seq:	GAUCCCAUAGCGGAGUGGAUAUCGCGUUAGACUCCGAAUCUAAAGGUCGUGGGUUCGAUUCCCACUGGGAUCA
Str:	>>>>>>>..>>>>........<<<<.>>>>>.......<<<<<.....>>>>>.......<<<<<<<<<<<<.
AT3G14855.trna1	(1-72)	Length:	72	bp
Type:	Cys	Anticodon:	GCA	at	33-35	(33-35)	Score:	80.9
Seq:	GGGUCCUUAGCUCAGUGGUAGAGCAUUUGACUGCAGAUCAAGAGGUCACCGGUUCGAACCCGGUAGGGCCCU
Str:	>>>>>>>..>>>>.......<<<<.>>>>>.......<<<<<.....>>>>>.......<<<<<<<<<<<<.
AT3G16552.trna1	(1-73)	Length:	73	bp
Type:	Lys	Anticodon:	CUU	at	34-36	(34-36)	Score:	88.3
Seq:	GCCCGUCUAGCUCAGUUGGUAGAGCGCAAGGCUCUUAACCUUGUGGUCGUGGGUUCGAACCCCACGGUGGGCG
Str:	>>>>>>>..>>>>........<<<<.>>>>>.......<<<<<.....>>>>>.......<<<<<<<<<<<<.
AT3G18815.trna1	(1-74)	Length:	74	bp
Type:	Thr	Anticodon:	AGU	at	35-37	(35-37)	Score:	75
Seq:	GCUCUCGUAGCUCAGUUGGUUAGAGCACCCGUUUAGUAAGCGGGAGGUCUUGAGUUCAACUCUCAACGAGAGCA
Str:	>>>>>>>..>>>>.........<<<<.>>>>>.......<<<<<.....>>>>>.......<<<<<<<<<<<<.
AT3G20655.trna1	(1-73)	Length:	73	bp
Type:	Arg	Anticodon:	ACG	at	34-36	(34-36)	Score:	71.4
Seq:	GGUUCCAUGGCCCAAUGGAUAAGGCGCUGGUCUACGAAACCAGAGAUUCUGGGUUCGAUCCCCAGUGGAAUCG
Str:	>>>>>>>..>>>..........<<<.>>>>>.......<<<<<.....>>>>>.......<<<<<<<<<<<<.
AT3G20885.trna1	(1-82)	Length:	82	bp
Type:	Ser	Anticodon:	GCU	at	34-36	(34-36)	Score:	76.2
Seq:	GUCGCUUUGGCCGAGUGGUUAAGGCGUGUGCCUGCUAAGUACAUGGGAUUUUCCCGCGAGAGUUCGAAUCUCUCAGGCGACG
Str:	>>>>>>>..>>>..........<<<.>>>>>.......<<<<<.>>>>...<<<<..>>>>>.......<<<<<<<<<<<<.
AT3G45955.trna1	(1-74)	Length:	74	bp
Type:	Val	Anticodon:	AAC	at	35-37	(35-37)	Score:	65.6
Seq:	GGUUUCGUGGUGUAGUUGGUUAUCACGUCAGUCUAACACACUAAAGGUCUCCGGUUCGAACCCGGGCGAAGCCA
Str:	>>>>>>>..>>>...........<<<.>.>>>.......<<<.<.....>>>>>.......<<<<<<<<<<<<.
AT3G46875.trna1	(1-82)	Length:	82	bp
Type:	Ser	Anticodon:	AGA	at	34-36	(34-36)	Score:	77.8
Seq:	GUGGGCGUGCCGGAGUGGUUAUCGGGCAUGACUAGAAAUCAUGUGGGCUUUGCCCGCGCAGGUUCGAAUCCUGCCGCUCACG
Str:	>>>>>>>..>>>>........<<<<.>>>>>.......<<<<<.>>>>...<<<<..>>>>>.......<<<<<<<<<<<<.
AT3G50665.trna1	(1-72)	Length:	72	bp
Type:	Glu	Anticodon:	UUC	at	34-36	(34-36)	Score:	69.3
Seq:	UCCAUUGUCGUCCAGCGGUUAGGAUAUCUGGCUUUCACCCAGGAGaCCCGGGUUCGAUUCCCGGCAAUGGAG
Str:	>>>>>>>..>>>>........<<<<.>>>>>.......<<<<<....>>>>>.......<<<<<<<<<<<<.
AT3G50835.trna1	(1-73)	Length:	73	bp
Type:	Val	Anticodon:	UAC	at	34-36	(34-36)	Score:	71.6
Seq:	GGUGCUGUGGUGUAGUGGUUAUCACGUUUGCCUUACACGCAAAAGGUCUCCAGUUCGACCCUGGGCAGCACCA
Str:	>>>>>>>..>>>..........<<<.>>>>>.......<<<<<.....>>>>>.......<<<<<<<<<<<<.
Type:	Glu	Anticodon:	CUC	at	35-37	(35-37)	Score:	77
Seq:	UCCGUCGUAGUCUAGCUGGUUAGGAUACUCGGCUCUCACCCGAGAGaCCCGGGUUCGAGUCCCGGCGACGGAG
Str:	>>>>>>>..>>>>.........<<<<.>>>>>.......<<<<<....>>>>>.......<<<<<<<<<<<<.
AT3G52345.trna1	(1-72)	Length:	72	bp
Seq:	GGGUCCAUAGCUCAGUGGUAGAGCAUUUGACUGCAGAUCAAGAGGUCACCGGUUCGAACCCGGUUGGGCCCU
Str:	>>>>>>>..>>>>.......<<<<.>>>>>.......<<<<<.....>>>>>.......<<<<<<<<<<<<.
AT3G55795.trna1	(1-72)	Length:	72	bp
Type:	iMeU	Anticodon:	CAU	at	33-35	(33-35)	Score:	46.5
Seq:	AUCAAAGUGGUGCAGCGGAAGCGUGAUGGGCCCAUAACCCACAGGUCACAGGAUCGAAACCUGUCUUUGAUA
Str:	>>>>>>>..>>>>.......<<<<..>>>>.......<<<<......>>>>>.......<<<<<<<<<<<<.
AT3G58035.trna1	(1-82)	Length:	82	bp
Type:	Ser	Anticodon:	GCU	at	34-36	(34-36)	Score:	78.8
Seq:	GACACUUUGGCCGAGUGGUUAAGGCGUUUGCCUGCUAAGUAAAUGGGGUUUCCCCGCGAGAGUUCGAAUCUCUCAGGUGUCG
Str:	>>>>>>>..>>>..........<<<.>>>>>.......<<<<<.>>>>...<<<<..>>>>>.......<<<<<<<<<<<<.
AT3G59415.trna1	(1-71)	Length:	71	bp
Type:	Thr	Anticodon:	UGU	at	33-35	(33-35)	Score:	66.1
Seq:	GCCCGUAUAGCUCAGUGGUAGAGCGUCAGUCUUGUAAACUGAAGGUCCGUAGUUCGAUCCUGCGUGUGGCA
Str:	>>>..>>..>>>>.......<<<<.>>>>>.......<<<<<.....>>>>>.......<<<<<<<.<<<.
AT3G60075.trna1	(1-82)	Length:	82	bp
Type:	Ser	Anticodon:	GCU	at	34-36	(34-36)	Score:	62.6
Seq:	GUCGCUUUGGCCGAGUGGUUAAGGCGUGUUCCUGCUAAGUACAUGGGGUUUCCCCGCGAGAGUUCGAAUCUGUCAGGCGACG
Str:	>>>>>>>..>>>..........<<<.>>>.>.......<.<<<.>>>>...<<<<..>>.>>.......<<.<<<<<<<<<.
AT3G61755.trna1	(1-73)	Length:	73	bp
Type:	Ala	Anticodon:	CGC	at	34-36	(34-36)	Score:	67.5
Seq:	GGGGAUGUAGCUCAUAUGGUAGAGCGCUCGCUUCGCAUGCGAGAGGcACGGGGUUCGAUUCCCCGCAUCUCCA
Str:	>>>>>>>..>>>>........<<<<.>>>>>.......<<<<<.....>>>>>.......<<<<<<<<<<<<.
AT3G61825.trna1	(1-72)	Length:	72	bp
Type:	Gln	Anticodon:	CUG	at	34-36	(34-36)	Score:	73.7
Seq:	GGUUCCAUGGUCUAGUGGUcAGGACAUUGGACUCUGAAUCCAGUAaCCCGAGUUCAAGUCUCGGUGGAACCU
Str:	>>>>>>>..>>>>........<<<<.>>>>>.......<<<<<....>>>>>.......<<<<<<<<<<<<.
AT3G62245.trna1	(1-73)	Length:	73	bp
Type:	Ala	Anticodon:	UGC	at	34-36	(34-36)	Score:	66.6
Seq:	GGGGAUGUAGCUCAUAUGGUAGAGCGCUCGCUUUGCAUGCGAGAGGcACAGGGUUCGAUUCCCUGCAUCUCCA
Str:	>>>>>>>..>>>>........<<<<.>>>>>.......<<<<<.....>>>>>.......<<<<<<<<<<<<.
AT4G01355.trna1	(1-74)	Length:	74	bp
Type:	Val	Anticodon:	AAC	at	35-37	(35-37)	Score:	33.1
Seq:	GGUUUCGUGGUGUAGUUGUUUAUCACGUCAUUCUAACACAACUAAGGUUUCUGGUUCGAACCCGGUCAAAACCA
Str:	>>>>>.>..>>>...........<<<.>..>>.......<<..<......>>>>.......<<<<.<.<<<<<.
AT4G02055.trna1	(1-72)	Length:	72	bp
Type:	His	Anticodon:	GUG	at	34-36	(34-36)	Score:	47.2
Seq:	GUGGUUGUAGUAUAGCGGUUAGUAUCCCACGUUGUGGCCGUGGGGaCCCGGGCUCGAAUCCCGGCAGCCACA
Str:	>>>>>>>..>>>>........<<<<.>>>>>.......<<<<<....>>>>>.......<<<<<<<<<<<<.
AT4G03405.trna1	(1-72)	Length:	72	bp
Type:	Gln	Anticodon:	CUG	at	34-36	(34-36)	Score:	74.6
Seq:	GGUCCUAUGGUCUAGUGGUcAGGACAUUGGACUCUGAAUCCAGUAaCCCGAGUUCAAAUCUCGGUAGGACCU
Str:	>>>>>>>..>>>>........<<<<.>>>>>.......<<<<<....>>>>>.......<<<<<<<<<<<<.
AT4G08345.trna1	(1-86)	Length:	86	bp
Type:	Leu	Anticodon:	UAG	at	35-37	(35-37)	Score:	45.2
Seq:	GCCGCUAUGGUGAAAUUGGUaGACACGCUGCUCUUAGGAAGCAGUGCUAGAGCAUCUCGGUUCGAgUUcgaGUCCGAGUAGCGGCA
Str:	>>>>>>>..>>>...........<<<.>>>>>.......<<<<<.>>>..<<<..>>>>>.............<<<<<<<<<<<<.
AT4G11213.trna1	(1-84)	Length:	84	bp
Type:	Leu	Anticodon:	UAA	at	35-37	(35-37)	Score:	79
Seq:	GUCAGUAUGGCCGAGUGGUcUAAGGCGCCAGACUUAAGUUCUGGUCCUCUUACGAGGGCGUGGGUUCAAACCCCACUGCUGACA
Str:	>>>>>>>..>>>...........<<<.>>>>>.......<<<<<.>>>>....<<<<..>>>>>.......<<<<<<<<<<<<.
AT4G11355.trna1	(1-73)	Length:	73	bp
Type:	Ala	Anticodon:	AGC	at	34-36	(34-36)	Score:	63.4
Seq:	GGGGAUGUAGCUCAGAUGGUAGAGCGCUCGCUUAGCAUGCGAGAGGcACGGGGAUCGAUACCCCGCAUCUCCA
Str:	>>>>>>>..>>>>........<<<<.>>>>>.......<<<<<.....>>>>>.......<<<<<<<<<<<<.
AT4G12405.trna1	(1-74)	Length:	74	bp
Type:	Asn	Anticodon:	GUU	at	35-37	(35-37)	Score:	77.6
Seq:	GCUGGAGUAGCUCAGUUGGUUAGAGCGUGUGGCUGUUAACCACAAGGUCAGAGGUUCGACCCCUUUCUCUAGCG
Str:	>>>>>>>..>>>>.........<<<<.>>>>>.......<<<<<.....>>>>>.......<<<<<<<<<<<<.
AT4G16235.trna1	(1-73)	Length:	73	bp
Type:	Val	Anticodon:	UAC	at	34-36	(34-36)	Score:	71.5
Seq:	GAUUCUGUGGUGUAGUGGUUAUCACGUUUGCCUUACACGCAAAAGGUCUCCAGUUCGAUCCUGGGCAGAAUCA
Str:	>>>>>>>..>>>..........<<<.>>>>>.......<<<<<.....>>>>>.......<<<<<<<<<<<<.
AT4G17975.trna1	(1-72)	Length:	72	bp
Type:	Cys	Anticodon:	GCA	at	33-35	(33-35)	Score:	74.5
Seq:	GGGUCCAUAGCUCAGUGAUAGAGCAAUUGACUGCAGAUCAAUAGGUCACCGGUUCGAACCCGGUUGGGCCCU
Str:	>>>>>>>..>>>>.......<<<<.>>>>>.......<<<<<.....>>>>>.......<<<<<<<<<<<<.
AT4G18725.trna1	(1-73)	Length:	73	bp
Type:	Glu	Anticodon:	CUC	at	35-37	(35-37)	Score:	69.7
Seq:	UCCGUUGUAGUCUAGCUGGUcAGGAUACUCGGCUCUCACCCAAGAGaCCCGGGUUCGAGUCCCGGCAACGGAG
Str:	>>>>>>>..>>>>.........<<<<.>>.>>.......<<.<<....>>>>>.......<<<<<<<<<<<<.
AT4G23635.trna1	(1-84)	Length:	84	bp
Type:	Leu	Anticodon:	CAA	at	35-37	(35-37)	Score:	79.8
Seq:	GUCAGGGUGGCCGAGUGGUcUAAGGCGCCAGACUCAAGUUCUGGUCCUCGUAAGAGGGCGUGGGUUCAAAUCCCACUUCUGACA
Str:	>>>>>>>..>>>...........<<<.>>>>>.......<<<<<.>>>>....<<<<..>>>>>.......<<<<<<<<<<<<.
AT4G25435.trna1	(1-73)	Length:	73	bp
Type:	Lys	Anticodon:	CUU	at	34-36	(34-36)	Score:	77.2
Seq:	GCCCGUCUAGCUCAGUUGGUAGAGCGCAAGGCUCUUAACCUUCUGGUCGUGGGUUCGAGCCCCACGGUGGGCG
Str:	>>>>>>>..>>>>........<<<<..>>>>.......<<<<......>>>>>.......<<<<<<<<<<<<.
AT4G25635.trna1	(1-84)	Length:	84	bp
Type:	Leu	Anticodon:	CAA	at	35-37	(35-37)	Score:	80.7
Seq:	GUCAGGAUGGCCGAGUGGUcUAAGGCGCCAGACUCAAGUUCUGGUCUUCGUAAGAGGGCGUGGGUUCAAACCCCACUUCUGACA
Str:	>>>>>>>..>>>...........<<<.>>>>>.......<<<<<.>>>>....<<<<..>>>>>.......<<<<<<<<<<<<.
AT4G28362.trna1	(1-72)	Length:	72	bp
Type:	Lys	Anticodon:	UUU	at	33-35	(33-35)	Score:	91.2
Seq:	GCCGUCUUAGCUCAGUGGUAGAGCGCGUGGCUUUUACCCACGAGGcCGUGGGUUCGAUCCCCACAGACGGCG
Str:	>>>>>>>..>>>>.......<<<<.>>>>>.......<<<<<.....>>>>>.......<<<<<<<<<<<<.
AT4G31075.trna1	(1-73)	Length:	73	bp											1
Type:	Arg	Anticodon:	UCU	at	34-36	(34-36)	Score:	70.7
Seq:	GCACCCAUGGCCUAAUGGAUAAGGCGCUUGACUUCUAAUCAAGCGAUUGUGGGUUCGAGUCCCACUGGGUGUG
Str:	>>>>>>>..>>>>........<<<<.>>>>>.......<<<<<.....>>>>>.......<<<<<<<<<<<<.
AT4G31265.trna1	(1-73)	Length:	73	bp
Type:	Arg	Anticodon:	ACG	at	34-36	(34-36)	Score:	72.9
Seq:	GACUCCAUGGCCCAAUGGAUAAGGCGCUGGUCUACGAAACCAGAGAUUCUGGGUUCGAUCCCCAGUGGAGUCG
Str:	>>>>>>>..>>>..........<<<.>>>>>.......<<<<<.....>>>>>.......<<<<<<<<<<<<.
AT4G34035.trna1	(1-73)	Length:	73	bp
Type:	Arg	Anticodon:	UCU	at	34-36	(34-36)	Score:	70.3
Seq:	GCGCUCGUGGCCCAAUGGAUAAGGCGUCUGACUUCUAAUCAGACGAUUGUGGGUUCGAUCCCCACCGAGCGUG
Str:	>>>>>>>..>>>..........<<<.>>>>>.......<<<<<.....>>>>>.......<<<<<<<<<<<<.
AT4G34415.trna1	(1-73)	Length:	73	bp
Type:	Arg	Anticodon:	CCU	at	34-36	(34-36)	Score:	66.6
Seq:	GCGCCUGUAGCUCAGUGGAUAGAGCGUCUGUUUCCUAAGCAGAAAGUCGAAGGUUCGACCCCUUCCUGGCGCG
Str:	>>>>>.>..>>>>........<<<<.>>>>>.......<<<<<.....>>>>>.......<<<<<<.<<<<<.
AT5G02025.trna1	(1-71)	Length:	71	bp
Type:	Gly	Anticodon:	GCC	at	33-35	(33-35)	Score:	62.4
Seq:	GCACCAGUGGUCUAGUGGCAUGAUAGUACCCUGCCACGGUACAUaCCCGGGUUCAAUUCCCGGCUGGUGCA
Str:	>>>>>>>..>>>.........<<<.>>>>>.......<<<<<....>>>>>.......<<<<<<<<<<<<.
AT5G02725.trna1	(1-82)	Length:	82	bp
Type:	Ser	Anticodon:	CGA	at	34-36	(34-36)	Score:	83.5
Seq:	GUCGAUAUGUCCGAGUGGUUAAGGAGAUUGACUCGAAAUCAAUUGGGCUUUGCCCGCGCAGGUUCGAAUCCUGCUGUCGACG
Str:	>>>>>>>..>>>..........<<<.>>>>>.......<<<<<.>>>>...<<<<..>>>>>.......<<<<<<<<<<<<.
AT5G03775.trna1	(1-73)	Length:	73	bp											1
Type:	Arg	Anticodon:	UCU	at	34-36	(34-36)	Score:	66.1
Seq:	GCACCCGUGGCCUAAUGGAUAAGGCGUUUGACUUCUAAUCACACGAUUGUGGGUUCGAGUCCCACCGGGUGUG
Str:	>>>>>>>..>>>>........<<<<.>.>>>.......<<<.<.....>>>>>.......<<<<<<<<<<<<.
AT5G07625.trna1	(1-84)	Length:	84	bp
Type:	Leu	Anticodon:	CAA	at	35-37	(35-37)	Score:	75.5
Seq:	GUCAGGUUGGCCGAGUGGUcUAAGGCGCCAGACUCAAGUUCUGGUCUUCGAGagaGGgCGUGGGUUCAAAUCCCACAUCUGACA
Str:	>>>>>>>..>>>...........<<<.>>>>>.......<<<<<.>>>><<<...<...>>>>>.......<<<<<<<<<<<<.
AT5G10525.trna1	(1-73)	Length:	73	bp
Type:	Arg	Anticodon:	CCU	at	34-36	(34-36)	Score:	73.8
Seq:	GCGUCUGUAGCUCAGUGGAUAGAGCGUCUGUUUCCUAAGCAGAAGGUCGUAGGUUCGACCCCUACCUGACGCG
Str:	>>>>>.>..>>>>........<<<<.>>>>>.......<<<<<.....>>>>>.......<<<<<<.<<<<<.
AT5G18085.trna1	(1-72)	Length:	72	bp
Type:	Trp	Anticodon:	CCA	at	33-35	(33-35)	Score:	66.2
Seq:	GGAUCCGUGGCGCAAUGGUAGCGCGUCUGACUCCAGAUCAGAAGGUUGCUUGUUCGAUUCACGUCGGGUUCA
Str:	>>>>>>>..>>>>.......<<<<.>>>>>.......<<<<<.....>>.>>.......<<.<<<<<<<<<.
AT5G20852.trna1	(1-72)	Length:	72	bp
Type:	Cys	Anticodon:	GCA	at	33-35	(33-35)	Score:	78.6
Seq:	GGGUUCAUAGCUCAGUGGUAGAGCAAUUGACUGCAGAUCAAUAGGUCACCGGUUCGAACCCGGUUGGGCCCU
Str:	>>>>>>>..>>>>.......<<<<.>>>>>.......<<<<<.....>>>>>.......<<<<<<<<<<<<.
AT5G20856.trna1	(1-72)	Length:	72	bp
Type:	Cys	Anticodon:	GCA	at	33-35	(33-35)	Score:	62.9
Seq:	AGGUCCAUAGCUCAGUGGUAGAGCAAUUGACUGCAGAUCAAUAGGUCACCGGUUUGAACCUGGUUGGGCCCU
Str:	.>>>>>>..>>>>.......<<<<.>>>>>.......<<<<<.....>>>>>.......<<<<<<<<<<<..
AT5G20858.trna1	(1-72)	Length:	72	bp
Type:	Cys	Anticodon:	GCA	at	33-35	(33-35)	Score:	67.7
Seq:	AGGUCCAUAGCUCAGUGGUAGAGCAAUUGACUGCAGAUCAAUAGGUCACCGGUUCGAACCCGAUUGGGCCCU
Str:	.>>>>>>..>>>>.......<<<<.>>>>>.......<<<<<.....>.>>>.......<<<.<<<<<<<..
AT5G23665.trna1	(1-72)	Length:	72	bp
Type:	Gln	Anticodon:	UUG	at	34-36	(34-36)	Score:	71.9
Seq:	GGUUCUAUGGUGUAGUGGUUAGCACUCAGGACUUUGAAUCCUGCGaCCUGGGUUCGACUCCCGGUAGAACCU
Str:	>>>>>>>..>>>>........<<<<.>>>>>.......<<<<<....>>>>>.......<<<<<<<<<<<<.
AT5G32017.trna1	(1-72)	Length:	72	bp
Type:	Asp	Anticodon:	GUC	at	34-36	(34-36)	Score:	62.3
Seq:	GUCGUUAUAGUAUAGUGGUaAGUAUUCCCGCCUGUCAUGCGGGUGaCCCGGGUUCAAUCCCCGGCAACGGCG
Str:	>>>>>>...>>>>........<<<<.>>>>>.......<<<<<....>>>>>.......<<<<<.<<<<<<.
AT5G35605.trna1	(1-73)	Length:	73	bp
Type:	Arg	Anticodon:	CCU	at	34-36	(34-36)	Score:	55.8
Seq:	GCGCAUGUAGCUCAGUGGAUAGAGCGUCUGUUUCCUAAGCAGAAGGUCGUAGGUUUGACCCCUACCUGGCACG
Str:	>.>>..>..>>>>........<<<<.>>>>>.......<<<<<.....>>>>>.......<<<<<<..<<.<.
AT5G41265.trna1	(1-72)	Length:	72	bp
Type:	Cys	Anticodon:	GCA	at	33-35	(33-35)	Score:	75.8
Seq:	GGGCCCAUAGCUCAGUGGUAGAGCAUUCGACUGCAGAUCGAGAGGUCACCGGUUCGAACCCGGUUGAGCCCU
Str:	>>>>.>>..>>>>.......<<<<.>>>>>.......<<<<<.....>>>>>.......<<<<<<<.<<<<.
AT5G41675.trna1	(1-72)	Length:	72	bp
Type:	iMeU	Anticodon:	CAU	at	33-35	(33-35)	Score:	59
Seq:	AGCAGAGUGGCGCAGCGGAAGCGUGGUGGGCCCAUAACCCACAGGUCCCAGGAUCGAAACCUGGCUCUGCUA
Str:	>>>>>>>..>>>>.......<<<<.>>>>>.......<<<<<.....>>>>>.......<<<<<<<<<<<<.
AT5G46595.trna1	(1-72)	Length:	72	bp
Type:	Cys	Anticodon:	GCA	at	33-35	(33-35)	Score:	81.7
Seq:	GGGUCCAUAGCUCAGUGGUAGAGCAAUUGACUGCAGAUCAAUAGGUCACCGGUUCGAACCCGGUUGGGCCCU
Str:	>>>>>>>..>>>>.......<<<<.>>>>>.......<<<<<.....>>>>>.......<<<<<<<<<<<<.
AT5G48465.trna1	(1-72)	Length:	72	bp
Type:	Lys	Anticodon:	UUU	at	33-35	(33-35)	Score:	82.9
Seq:	GCCUUCUUAGCUCAGUGGUAGAGCGCGUGGCUUUUAACCACGUGGUCGUGGGUUCGAUCCCCACAGACGGCG
Str:	>>>.>>>..>>>>.......<<<<.>>>>>.......<<<<<.....>>>>>.......<<<<<<<<.<<<.
AT5G58495.trna1	(1-82)	Length:	82	bp
Type:	Ser	Anticodon:	CGA	at	34-36	(34-36)	Score:	77.5
Seq:	GUCAAUAUGUCCGAGUGGUUAAGGAGACAGACUCGAAAUCUGUUGGGCUUUGCCUGCGCAGGUUCGAAUCCUGCUGUUGACG
Str:	>>>>>>>..>>>..........<<<.>>>>>.......<<<<<.>>>>...<<<<..>>>>>.......<<<<<<<<<<<<.
AT5G60285.trna1	(1-81)	Length:	81	bp
Type:	Leu	Anticodon:	AAG	at	36-38	(36-38)	Score:	71.4
Seq:	GUUGAUAUGGCCGAGUUGGUccAAGGCGCCAGAUUAAGGUUCUGGUccgaaaGGgCGUGGGUUCAAAUCCCACUGUCAACA
Str:	>>>>>>>..>>>............<<<.>>>>>.......<<<<<...........>>>>>.......<<<<<<<<<<<<.
AT5G61835.trna1	(1-74)	Length:	74	bp
Type:	Tyr	Anticodon:	GUA	at	34-36	(34-36)	Score:	75.9
Seq:	CCGACCUUAGCUCAGUUGGUAGAGCGGAAGACUGUAAUAUCUUUAGGUCGCUGGUUCGAUUCCGGCAGGUCGGA
Str:	>>>>>>>..>>>>........<<<<.>>>>>........<<<<<.....>>>>>.......<<<<<<<<<<<<.
AT5G64735.trna1	(1-72)	Length:	72	bp
Type:	His	Anticodon:	GUG	at	34-36	(34-36)	Score:	63
Seq:	GUGGCUGUAGUUUAGUGGUUAGAAUUCCACGUUGUGGCCGUGGAGaCCUGGGCUCGAAUCCCAGCAGCCACA
Str:	>>>>>>>..>>>>........<<<<.>>>>>.......<<<<<....>>>>>.......<<<<<<<<<<<<.
AT5G65015.trna1	(1-73)	Length:	73	bp
Type:	Arg	Anticodon:	ACG	at	34-36	(34-36)	Score:	73.2
Seq:	GACUCCGUGGCCCAAUGGAUAAGGCGCUGGUCUACGAAACCAGAGAUUCUGGGUUCGAUCCCCAGCGGAGUCG
Str:	>>>>>>>..>>>..........<<<.>>>>>.......<<<<<.....>>>>>.......<<<<<<<<<<<<.
AT5G65445.trna1	(1-82)	Length:	82	bp
Type:	Ser	Anticodon:	GCU	at	34-36	(34-36)	Score:	76.7
Seq:	GUCGCUUUGGCCGAGUGGUUAAGGCGCUCGCCUGCUAAGUGAGUGGGAUUUUCCCGCGAGAGUUCGAAUCUCUCAGGCGACG
Str:	>>>>>>>..>>>..........<<<.>>>>>.......<<<<<.>>>>...<<<<..>>>>>.......<<<<<<<<<<<<.

## Sheet: 9
Supplemental Data 9 GO enrichment among genes with the 5 pct highest Arg codons AGA and CGG combined frequency.
	GO.ID	Term	Annotated	Significant	Expected	weightFisher	p.adj	ontology	group	group.size
1	GO:0016607	nuclear speck	67	20	3.07	1.1e-11	6.314e-09	CC	5 pct highest AGA,CGG combined freq	1371
2	GO:0005681	spliceosomal complex	159	25	7.3	2e-06	0.000574	CC	5 pct highest AGA,CGG combined freq	1371
3	GO:0005762	mitochondrial large ribosomal subunit	24	7	1.1	7.3e-05	0.0139673	CC	5 pct highest AGA,CGG combined freq	1371
4	GO:0033612	receptor serine/threonine kinase binding	71	14	3.28	3.8e-06	0.0048564	MF	5 pct highest AGA,CGG combined freq	1371
5	GO:0000398	mRNA splicing, via spliceosome	230	40	9.56	8.1e-14	2.58876e-10	BP	5 pct highest AGA,CGG combined freq	1371
6	GO:0045168	cell-cell signaling involved in cell fat...	41	16	1.7	2.7e-12	4.3146e-09	BP	5 pct highest AGA,CGG combined freq	1371
7	GO:0010088	phloem development	31	10	1.29	2.9e-07	0.000308947	BP	5 pct highest AGA,CGG combined freq	1371
8	GO:0045892	negative regulation of DNA-templated transcription	214	26	8.9	6.2e-07	0.000360691	BP	5 pct highest AGA,CGG combined freq	1371
9	GO:0048026	positive regulation of mRNA splicing, via spliceosome	6	5	0.25	7.1e-07	0.000360691	BP	5 pct highest AGA,CGG combined freq	1371
10	GO:0008285	negative regulation of cell population proliferation	42	11	1.75	7.9e-07	0.000360691	BP	5 pct highest AGA,CGG combined freq	1371
11	GO:0010078	maintenance of root meristem identity	42	11	1.75	7.9e-07	0.000360691	BP	5 pct highest AGA,CGG combined freq	1371
12	GO:0048367	shoot system development	996	56	41.41	9.9e-07	0.000395505	BP	5 pct highest AGA,CGG combined freq	1371
13	GO:1905582	response to mannose	7	4	0.29	9.4e-05	0.0333804	BP	5 pct highest AGA,CGG combined freq	1371

## Sheet: 10
Supplemental Data 10. Neighboring codon pair SCs. Compare Figure 3A.
dicodon	SC
GCUGCU	0.123326
GCUGGU	0.118824
GGUGCU	0.117386
GCUGAG	0.101914
GAUGCU	0.0985537
GCUGGA	0.0985203
GCUGAU	0.0945969
CCUGCU	0.0930068
GCUGCA	0.0926243
AUUGCU	0.0920911
GGAAAG	0.0900395
GCUGUU	0.0880929
GUUGCU	0.0870157
CUUGCU	0.086136
ACUGGA	0.0836646
ACUGGU	0.0818542
GUUGGU	0.0810755
ACUGCU	0.0808841
GCCAAG	0.0808342
ACUGUU	0.0797968
GAGGCU	0.0796191
AAGGAU	0.0791568
AAGGUU	0.0786345
AAGGCU	0.0780762
AAGGAC	0.0780202
AUUGGU	0.0776212
GGUGUU	0.0766789
GGUGCA	0.0763391
GUUGCA	0.0761422
GGUAUU	0.0749371
GCUGUG	0.0738116
GAUGCA	0.0730703
AUUGGA	0.0714026
GCUAAG	0.0713959
GCUGAA	0.0704075
GUUGCC	0.069605
CAGGCU	0.069546
CCUGGA	0.0694246
AAGGGU	0.0692949
GCAAAG	0.0676411
GGUGCC	0.0676051
AAGGAA	0.0674347
AAUGCU	0.0674136
AAGGCC	0.0668653
GAUGUU	0.066796
UACAAG	0.0657374
AUUGAG	0.0653233
UAUGCU	0.0650773
CUUGGU	0.0644635
GCUGUC	0.0633087
AUUGUU	0.0630711
CGUGCU	0.0629685
GGAACU	0.0624992
GCUGCC	0.0622393
GGUCCU	0.0620825
GUUGUU	0.0620466
GUUGGA	0.0620378
AUCCAG	0.0620149
GAUGCC	0.0615606
GAGGCA	0.061373
CUUGCA	0.061044
GUUGUC	0.060906
UUCCAG	0.0607142
GAGGGA	0.0605014
GCUCUU	0.060203
AAGUAC	0.0601629
UAUGAG	0.0601179
GGUGUC	0.0597699
ACUGAG	0.0597038
CCUGCA	0.0593104
GCUGGG	0.0591596
GGAAUG	0.0588967
GCAACU	0.0586534
GACAAG	0.0585041
AUUGCA	0.0578745
GUCAAG	0.0576738
UUUGCU	0.0575788
CCUGGG	0.0574501
AUUGUC	0.0571536
GCACCU	0.0566595
CCUGAG	0.0566075
GCAGGU	0.0564852
AAGGAG	0.0561695
AAGGGA	0.0560656
CAGGCC	0.0558679
CCUGGU	0.0557533
GUCAUU	0.0555144
GGUACU	0.0554324
AAGGCA	0.0553162
AUUGCC	0.0553047
ACUGCA	0.0552317
CGUGUU	0.0550298
GGUGUG	0.0546527
ACUGCC	0.0544681
GUUGAC	0.0544492
ACUGUC	0.0543923
UAUGGU	0.0543877
GCUCAG	0.0543044
GGAGCU	0.0541709
GCCAUU	0.054144
AUUAAG	0.0541251
GAGGGU	0.0541024
GGAGGU	0.0541006
GAUGUC	0.0540546
AAGUUC	0.0539073
AGUGCU	0.0538415
GCUACU	0.0533171
GCACUU	0.0528518
ACCAAG	0.0527977
GCUAUU	0.0527914
AAGGUC	0.0527373
GAGCGU	0.0527149
GAGGCC	0.0525161
GCAAAU	0.052317
ACUGGC	0.0522435
UAUGCA	0.0521695
GCUGGC	0.052059
CGUGGU	0.0519448
CCAGCU	0.0516818
AUCAAG	0.0515948
ACUGAU	0.0515608
GUUGAU	0.0511223
AAGUAU	0.0510272
GAUGGA	0.0510262
GCACAG	0.0503772
GCCCUU	0.0499668
GCUCCU	0.0498662
AAGCGU	0.0498024
GCCCCU	0.0496992
UCUGGA	0.0496035
GGUCAG	0.0494025
GGGGCU	0.0493521
GCAGCU	0.0493186
UAUGGA	0.0491899
UUCAAG	0.0490138
GUUGAG	0.0488757
AAGGUG	0.0487844
CAGUAC	0.0487063
GACCCA	0.0484544
GCAUUC	0.0484533
CAGGCA	0.0483975
GCUGAC	0.0475531
ACUGAA	0.0475049
AAUGCA	0.0471876
GACAAA	0.0470982
GCCAAA	0.047087
GGUGGA	0.0467864
GAAGCU	0.046707
GAGCAG	0.0465129
ACUGGG	0.046465
CCUAUU	0.046446
GGACCU	0.0463702
AUUGUG	0.0461184
UAUGCC	0.0459072
GCUCGU	0.0458034
GCAGUU	0.0456528
GCAGAU	0.0456093
GCAUAC	0.0455503
GCCAGU	0.045524
AUCCGU	0.0453216
GAUGGC	0.0452324
CGUGCC	0.0452056
ACUGUG	0.0451287
GCCUUU	0.0451002
CGUGGA	0.0450379
GGGCGU	0.0450087
ACCCAG	0.0449833
CAGGUU	0.0448851
CAGGAU	0.0448375
UACCAG	0.044782
GGUCUU	0.0447734
GGAAUU	0.0445904
CUUGAG	0.0444953
GGACAG	0.0444694
CCUGAU	0.0442198
GGCAAG	0.044102
GAUGGU	0.0437832
GAUGUG	0.0436598
GACAGG	0.0436206
GGUAUC	0.0426878
GCAAUU	0.0426871
UUCAUU	0.0426383
GUCACU	0.042422
AAUGUC	0.0423437
CAGGAA	0.0422585
GUCCAG	0.0421581
GUUGGC	0.0421156
GCUCCA	0.0419786
UUUGGU	0.041835
CUGGGA	0.041749
GUUCAG	0.0417403
GCAGGA	0.0417286
GCUAUG	0.0416723
CUGGAU	0.0414367
GGUGGU	0.0413863
AUCAGG	0.0411762
UACCUG	0.0411145
AGUGCC	0.041048
GGUAUG	0.0410061
UCCCAG	0.0409336
GCCCAG	0.040868
CGUGAA	0.0408534
UACCCA	0.0408402
AAGGGC	0.0408126
GGUGAU	0.0407691
AUUAUU	0.0406552
GCCAUG	0.0406295
UUGGCU	0.0405691
AAAGCA	0.0405437
GCAGCA	0.0405004
CCUAAG	0.0402683
UUUGAG	0.0401458
UAUGUC	0.0401382
UAUGAC	0.0401242
GGACGU	0.040069
GCCUAU	0.0400346
GAAGCC	0.0400257
GGACUU	0.0400015
UCUGCU	0.039956
GCUAUC	0.0398572
GGGGAU	0.0397876
CCCAAG	0.0397778
ACUGAC	0.0394988
AAAGCU	0.0394113
CUGAAG	0.0393577
GAGGUU	0.0391984
GGGCCU	0.0391219
CCUGUU	0.0389671
AUUACU	0.0389365
CUGACA	0.0387253
GUUAUU	0.0387238
UUUGGA	0.0386449
AAGCCA	0.0385991
GUCCUU	0.0385812
AAGACC	0.0385434
CUUGGA	0.0385013
AUUGAC	0.0384466
GAAGGC	0.0383544
GUGAAG	0.0383174
CCAGAG	0.0382723
UAUGUU	0.0382651
GGUACC	0.0382457
UUCAGG	0.0382223
GCAUUU	0.0382215
GUCAGG	0.0382174
CCUGCC	0.0381993
CCAGGU	0.0381858
GGAUAC	0.0381126
GUUGAA	0.0380848
CCCCUU	0.0378459
GCAAAA	0.037831
AGGGGU	0.0377747
CUUGUU	0.0377522
GGAACA	0.0375632
CAGACU	0.0373745
AAUGUU	0.0372902
ACCAUU	0.0372392
CAGGGU	0.03709
ACUAUU	0.0370545
GCUACC	0.0370109
UUGGCA	0.0369915
GAUCCU	0.0369525
AAGCCU	0.0369215
UCUGCA	0.0368958
GGUCGU	0.036855
CAGGGA	0.0368398
GCCCGU	0.0366652
AGGGCA	0.0364975
GGCCAG	0.0364545
AUGGCA	0.0363901
AUUCAG	0.0363458
GUUGGG	0.0363106
UUUGCA	0.0362998
GCUGUA	0.0362643
UAUGAU	0.0361715
GCAGAC	0.0358494
GCAGGC	0.0358
CUUAUU	0.0357833
GACUAU	0.0354977
CUUCUG	0.0354824
GAGUAC	0.0353796
GGAGGC	0.0353058
GCAUAU	0.0352817
CAGGAC	0.0352691
GAGCCU	0.0352489
GGUCCA	0.035047
GGUGAG	0.0348145
AUUGGG	0.0347051
GACCCC	0.0345725
CGUGAG	0.0345377
CAUGGU	0.0345266
AUCACU	0.0343964
CUUGGG	0.0343863
CGCCAG	0.0343814
GCACUC	0.0343555
CAUGCU	0.0342602
GGUCCC	0.0342565
GGUCUG	0.0340684
ACAGUU	0.034059
AUUCUG	0.034045
GCUCCC	0.0340347
CCUGAA	0.0339917
AAGACU	0.0339898
CGCCCA	0.0339794
GUUCGC	0.0339421
CUGGGU	0.0339045
UUUGUU	0.0338554
GUUGUG	0.0338321
GACAUU	0.0337779
GCUACA	0.0337343
AAGCAC	0.0336746
ACCUUG	0.0336603
CUGGCU	0.033462
CUCAUU	0.0333676
AUCCUU	0.0332459
GAGAAG	0.0331773
GGCUAU	0.0331246
CGUGCA	0.0330801
CCAGCA	0.0329333
UCUGGG	0.0328742
AAAAUU	0.0328527
UCUGGU	0.0327539
GCACUG	0.0327524
UUGGGU	0.0326949
CAGAAG	0.0326612
GGGGGU	0.0326155
GCUCGC	0.0326119
CCUGCG	0.0326019
GUUAUC	0.0325871
AAGAUU	0.0323982
GAUGGG	0.0323194
GACUGG	0.032302
GGCACU	0.0322624
AUGGGU	0.032242
GGGAAG	0.0322336
GGCUUU	0.0320755
GAAAUU	0.032013
CAGGUC	0.0319703
AUAUAU	0.0319629
ACUCCU	0.0319522
GAGCGC	0.0319499
AGGGCU	0.0319429
ACUAAG	0.0318326
GCCUUG	0.0318316
GUCUGG	0.0317709
GUCUUU	0.0317351
CGUGAU	0.0316046
ACCCGU	0.0315902
AUUGAU	0.03148
GCCACU	0.0314736
GAGGUG	0.0313924
AAGUUU	0.0313176
AAGGGG	0.0313102
GUGCUU	0.0312147
GGCACC	0.0312049
UUCUGG	0.0311404
CCAAAG	0.0311368
CUUAUC	0.0311204
GCAUGG	0.0310026
GGCCCU	0.0309123
GGCACA	0.0307921
CCUGGC	0.0306861
CUAGCA	0.030675
GCACCA	0.03064
GGCAUU	0.0306302
AAUGAG	0.0306192
GACAUG	0.03055
GUCAGA	0.03055
UAUGAA	0.0305098
CUUGCC	0.0304959
GGUCAU	0.0304715
GCAUCU	0.0303523
GACACC	0.0303522
ACAGCU	0.0303433
GAUAUC	0.0303191
AAGCAG	0.0302943
UCUGUG	0.0302932
CUCAAG	0.0302105
GUGCCU	0.0301883
ACUCAG	0.0301186
GGAGCA	0.030086
CAGUUC	0.0300159
UUGGGC	0.0299921
GAACUU	0.0299444
GUCAAU	0.029927
AUGCUU	0.0298172
GAGGUC	0.029807
GCUAAC	0.0297624
CCAACU	0.0296603
UUCACU	0.0296507
GACACU	0.029613
GCCAAU	0.0295575
AACCUG	0.0294771
AAGCCC	0.0294723
UGCCAG	0.0293283
UUUGUC	0.0292677
GCCAUC	0.0292289
GACUAC	0.0292166
GGUACA	0.0291774
CUUAAG	0.0291605
GCUCAA	0.029001
CAGAUC	0.0289442
GGAACC	0.0288814
CUGAGG	0.0288677
GUUCCA	0.0288569
GAGUUC	0.0288314
GGUAAG	0.0288273
GAACUG	0.0287753
GGACAA	0.0287053
GGCCUU	0.0286935
UACUUG	0.028636
UACCCU	0.0285986
GGCGCU	0.0285693
CUGCUG	0.0284275
GUGCAG	0.0284197
GCAGGG	0.0284135
UUUGCC	0.0283903
CCCGCU	0.0283717
AAAGUU	0.0283501
CGCUUG	0.0282279
AAUGCC	0.028216
AAGCUG	0.0281664
GCCCCA	0.0281386
UACCGU	0.0280913
CAGGUG	0.0280804
CUGUAC	0.0280198
GGAUGG	0.0280105
AUUUUG	0.0279964
GUGGAC	0.0279633
CUGGCA	0.0279593
CUUACC	0.0279525
GGUUAC	0.0279422
GCAGUC	0.0279348
GAAGGU	0.027926
UUGGGA	0.0278993
UUGAAG	0.0278953
GCCCUG	0.0278767
ACAAUU	0.0278581
CCCCGU	0.0278422
CAAGCA	0.0278146
CAGACC	0.027763
UACAUU	0.0277613
ACUCUU	0.0277353
GUGGGU	0.0277261
CCCUAU	0.0275848
GCACAU	0.0275311
AUGUAC	0.0275152
ACCCUU	0.0274978
GCUUCC	0.0274477
ACUAUC	0.0274391
GCCCAA	0.02741
CUGGUU	0.0273622
ACCUAU	0.0273517
CCUACU	0.027282
ACCUUC	0.0272792
GAUACC	0.0272407
CCCAGG	0.0272344
AAGUCU	0.0271902
AAUGAC	0.0271248
GUUCUC	0.0270348
CCAGGA	0.0269958
UAUGUG	0.0269771
GGAGAG	0.0269609
GCUAGU	0.0268276
GCACGU	0.0268191
UCCCUU	0.026779
GGAAGG	0.0267735
GCACAA	0.0267597
CUGGCC	0.0266978
GGCAGG	0.0266715
GGCAAA	0.0266397
GGGGGG	0.0265424
ACAGGG	0.0264506
UACUUU	0.0264449
UUGACA	0.026427
AUGGGA	0.0264176
AGGCGU	0.0263769
GGGGUU	0.0263657
GGACCC	0.0262966
AUUCGU	0.026242
AUAUAC	0.0262156
GGAAAA	0.02618
GGGGAG	0.0260785
GGACAU	0.0260662
GCAAAC	0.0260452
CUGGUG	0.0260439
GAGGGC	0.026023
CCUGUG	0.0260059
UACAUG	0.0259695
GAGCCC	0.0259694
GCAGAA	0.0259623
AUUAUG	0.0259064
CAUGUU	0.0258834
GCAAGU	0.0258695
CGUGUG	0.0258369
UGUGCU	0.0258101
GAAUAU	0.0257698
GCGCUC	0.0257448
GCAGUG	0.0257024
GGUGAA	0.0256903
AUCCUG	0.0256634
CAGAUU	0.0256586
ACUCCA	0.0256514
AACAGG	0.0256391
GUGCUC	0.0255717
AUGGCU	0.025543
AGGGAA	0.0255185
GACCCU	0.0254846
GCACCC	0.0254786
GACCUU	0.0253642
GCAUCC	0.0253578
GACCGU	0.0253486
GUGCCC	0.0253152
ACCGAG	0.0252946
GCAGAG	0.025285
AGGCAC	0.0252715
GUAUUC	0.0252587
UAUCCU	0.0252516
GCAAGG	0.0252172
GCUCAC	0.0251852
CUGGAC	0.0251842
UUCCUG	0.0251704
AAGCUU	0.0251465
GAAUAC	0.0251302
CUGGAG	0.0251267
GUAGCA	0.0251231
GGAUAU	0.02512
CUGAAA	0.0251172
GGUUAU	0.0250699
UCUGGC	0.0250463
GUUCCU	0.0250447
GAACGU	0.0249765
UUGCUG	0.0248713
GGCUUC	0.0248623
CUGGAA	0.0248163
CGGGAU	0.0248141
CUGUAU	0.0248121
AUCCCA	0.0247876
GCAAUC	0.024697
AGUGGU	0.0246481
AUUAUC	0.0246346
GUGCUG	0.024615
GCUAGC	0.0245972
CAGGGG	0.0245575
CUGUCA	0.0244312
UGCUGU	0.0244088
AUUCCU	0.0243929
CAGGUA	0.0242901
UGGGGU	0.0242805
CAGCCC	0.0242773
GGGCAU	0.0242381
AGGGCC	0.0242155
CUGCGU	0.0242098
AGGGAG	0.024194
GAUAUU	0.0241861
CGUUUC	0.024179
AUAUUU	0.024084
GAGCUG	0.0240433
GGGCUU	0.0239828
ACAUAC	0.02393
CUGACU	0.0239275
UACACC	0.0239027
GAUGAG	0.0238932
GCACGC	0.0238763
CAUGCC	0.0238614
AGGCCU	0.023818
UACUGC	0.023699
AGGCCA	0.023681
ACAGUG	0.0236354
CACAUU	0.0236242
AAUGUG	0.023616
GGCAUA	0.0235857
CUUACA	0.0235249
GGGCGA	0.0235221
AUGGAC	0.0235101
CUACUU	0.0234512
GGUUUC	0.0234466
CAGUGC	0.0234329
CGCAAG	0.0234246
CGUCCC	0.0233882
CGCCUU	0.0233668
CACUGG	0.0233508
GAUCCC	0.0232812
GUGAAA	0.023276
CCCCAG	0.0232479
ACUUUC	0.0232434
UACAGG	0.0231875
CAAGCU	0.0231734
GGUGUA	0.0231332
ACAAAG	0.0231237
ACCUUU	0.0231021
CCAGCC	0.0230803
UUCAGU	0.0230763
CGCACA	0.0230571
GGUGGC	0.0230529
GCAUCA	0.0230306
CUUACU	0.0230236
GGACGC	0.0230211
GGAGCC	0.0229968
UGCCCA	0.0229842
GGCAGU	0.0229725
AGGGAU	0.0229543
UACACU	0.0229315
CUGAAC	0.0228787
CGUUAU	0.0228768
GCCUAC	0.0228763
GGGUAU	0.0228678
GAUCCA	0.0228104
GAGGAC	0.0227832
CGCAUU	0.0227769
GGGGCA	0.0227242
GAGCAU	0.0227225
UUUGGC	0.0227082
GCCCUA	0.0226923
GUUCUG	0.0226816
CAGCAG	0.0226702
GCUUUU	0.0226463
GAAGUC	0.0226283
ACCUGU	0.0226194
CUGGUC	0.0225919
GGAAAU	0.0225909
ACAGGC	0.022575
GAGACC	0.0225501
GGCCCA	0.0225395
GCCAAC	0.022517
GGACUG	0.0224551
GUGGCA	0.0224437
GUGUAU	0.0224109
AGCACU	0.0223424
CUCCUG	0.022323
AUUCCA	0.0223224
AGUGCG	0.0223138
GACCAG	0.022312
AACCCC	0.0223119
CGUCUG	0.0222902
CGCACU	0.0222524
GAUACU	0.0222383
UACAGC	0.0221886
UAUGGC	0.0221851
CAGUAU	0.0221386
UGGGAU	0.0221046
UGGGAC	0.0220881
UACCUU	0.0220712
GAGGGG	0.0220568
AUCAUU	0.0220333
GCAACC	0.022012
UUCCUU	0.0220096
CAGAAC	0.0220057
AACAUU	0.0219995
UCUGCC	0.021975
GGUGGG	0.0219272
GGGCAG	0.0218669
GUUACC	0.0218401
GGCUUG	0.0218357
ACCCGC	0.0218218
AGUGCA	0.0218034
GUUAAG	0.0217854
UAUAUC	0.0217687
CGCAUG	0.0217301
CUUCAG	0.0217128
AAAGGU	0.021708
CAAAUU	0.0215436
CUCCAG	0.0214829
CUCAGC	0.0214289
GACUUU	0.0213768
CCACCU	0.0213735
GUUCGU	0.0213165
UUCACC	0.0213139
AGGACC	0.0212653
AGGACU	0.0212595
AGGGGC	0.0211997
AACAAG	0.0211492
CAGAAA	0.0211437
GGAGUU	0.0211201
GCCACA	0.021084
CAGCUG	0.0210701
CUUGGC	0.0210537
CGCAGG	0.0210403
ACAGAC	0.0210303
AUAGCU	0.0209963
CUUGUG	0.0209823
GUCCCA	0.0209244
GAAUUU	0.0209213
UUGGCC	0.0208775
AAGCUC	0.0208203
CCCCGC	0.0207569
CAACUG	0.0206357
UUUGAC	0.0206117
AUGCGU	0.0206104
AAGGUA	0.0205986
GGUGCG	0.0205664
GUCCGU	0.0205275
GUCAAC	0.0204636
ACCAUC	0.0204438
GACCUG	0.0204104
UAUGCG	0.0202844
UGGAAG	0.0202553
CAUGGG	0.0202478
GCAAUG	0.0201988
CCUACC	0.0201941
AUCUAU	0.0201043
GUCGCU	0.0200916
AGGGGA	0.0200551
GUCUAU	0.0200359
ACAUAU	0.0200345
GUUGUA	0.0200332
CGACUG	0.0200166
GAGCAC	0.019938
AGUGGC	0.0199211
CUAGUU	0.0198951
AAGCAU	0.0198749
CCCUAC	0.0198494
CGCUAU	0.0198231
GAGGAU	0.0198155
GUCGAG	0.0197156
GCUGCG	0.0197068
ACCCCU	0.0196847
CUUCGU	0.0196794
GCUCUC	0.0196738
CAGUUG	0.0196645
GACUUG	0.0196092
GACACA	0.0196087
GCGCCU	0.0195991
GGGCAC	0.0195972
CGUAAG	0.0195886
CUUCGC	0.0195528
AACUUU	0.0195043
CUGCUU	0.0194951
AUGUUC	0.0194881
GGUGAC	0.0194759
ACACAG	0.0194513
GGGCUA	0.0194389
AGGCAG	0.0194011
UCUGAG	0.0193969
CCCAAA	0.0193462
AUUGGC	0.019325
GAAGUU	0.0193239
GUGCCA	0.0192627
AUUGAA	0.0192021
CAGCCA	0.0191877
CUGCAG	0.0191751
CUGCGC	0.0191314
CCAAUU	0.0191286
CUGGGG	0.0191114
AUCUGG	0.0190293
CCUGAC	0.0190132
GUCCUA	0.0189717
AUGCGC	0.0189581
UGGGCA	0.0189512
UUGGAC	0.0189384
ACUGUA	0.0189233
GCCAGG	0.0189184
ACUAUG	0.0188583
GUGCAU	0.0187999
GCCAGA	0.0187656
CUGAUU	0.018755
GGUCAA	0.018741
GACAUC	0.0186815
AUACUG	0.0186704
GUGCGA	0.018669
CACAAG	0.0185966
GUGGAG	0.0185292
UACACA	0.018509
GCCCUC	0.0185058
GCUAUA	0.0184089
CGUACC	0.0183554
UACGCA	0.0183526
CGCCAA	0.0183328
CGUAUC	0.0183271
CAUGCA	0.0182993
GUGAAC	0.0182966
ACUGCG	0.0182907
CCUAGC	0.0182794
CCAGUC	0.0182739
CACUGC	0.0182568
UAUGGG	0.0182301
CCAGUU	0.0182247
GGCGCA	0.0181942
AUUGCG	0.0181764
ACAGCA	0.0181629
UAUCCC	0.0181569
AUGCCU	0.0181413
ACAGGA	0.0181371
CACUAU	0.0181357
CUCUUG	0.0180709
GCCCAU	0.0180702
CAGGGC	0.0180579
CAAUUU	0.0180528
CAAGGU	0.0180455
UUGAAC	0.0180366
AGAGGU	0.0180302
CAGCCU	0.01802
AGGAAC	0.0180083
AAAGGC	0.0179901
CCAUAU	0.0179789
AAAUAC	0.0179412
GUGACU	0.0179235
UCACAG	0.0178369
AUGAUU	0.0178179
CCUACA	0.0177152
AGUGGA	0.0176035
CAUGGA	0.0175918
GGAUUC	0.0175685
CGCCCU	0.0175379
AAUGGA	0.0175096
GAAGGA	0.0175062
GGGCCA	0.0175024
GUGCGC	0.0174789
AUGGGC	0.0174372
GUGUCU	0.0174178
CCAACC	0.0174174
GGUCUC	0.0173907
CAGUCU	0.0173877
AAAUUU	0.0173701
CUAUAU	0.017358
CAGGAG	0.0173568
GGCAUG	0.0173415
AAACCU	0.0173283
CACGGU	0.017264
ACCCUG	0.0172635
UACUAC	0.0172402
GCUAAA	0.0172104
ACCAUA	0.0172012
AGCGCU	0.0171965
UGGUAC	0.0171789
UUUGUG	0.0171649
GGCAAC	0.0171622
GUGCUA	0.0171521
CACAGG	0.0171298
GAUGCG	0.0171196
AACCCA	0.0171084
GACUUC	0.0171006
AUGCUC	0.0170971
CGUCUU	0.0170879
AAGAUC	0.0170508
AUAACU	0.0170094
AAUAUU	0.0170075
GGUUCU	0.0169892
AGCAUG	0.0169613
AUGCCC	0.016955
GGAGUC	0.0169365
CUUGUC	0.0169313
AUGCUG	0.0169233
CAGUUU	0.0169172
GUACUG	0.0169023
GUCAGU	0.0168985
AUCCUA	0.0168947
GGGCUC	0.0168915
AGCACC	0.0168722
AGGGGG	0.0168599
AGGGAC	0.0168356
CGGGAG	0.0167996
AUUCUA	0.0167932
GGCCUG	0.0167916
GCACUA	0.016708
UUUACA	0.0167038
GGGACA	0.0165262
AAAGGA	0.0164691
GGCCAA	0.0164598
ACAGUC	0.0164585
GAGCCA	0.0164355
GUGUGC	0.0164273
CAGUGG	0.0164181
UUGAGG	0.0164115
GCCAUA	0.0164006
UUUGAA	0.0163965
GGGAUC	0.016392
GGACUC	0.0163586
ACCCAC	0.0163135
UUGACC	0.0163119
GUCAAA	0.0163088
GGACCA	0.0162709
GGUAAA	0.0162691
GCUAAU	0.016252
GUGGGA	0.0161786
GUACAG	0.0161706
CAGCUU	0.0161594
AGGUCC	0.0161189
AUGCAG	0.0160581
CCCCCU	0.0160139
GCAUUG	0.0159866
CAGCGU	0.0159361
GUGACC	0.015925
CGUAUU	0.0159179
UCCAAG	0.0159091
GGCCCC	0.015903
CGUACU	0.0158478
ACACCU	0.0158272
ACUCCC	0.0158177
ACAUUU	0.0158105
UCCCUG	0.0158021
AUGACC	0.0157955
UGCACU	0.0157814
ACUUUG	0.0157788
CCAGAC	0.0156923
ACAGCC	0.0156689
GUGACA	0.0156652
AAGCGC	0.015655
CACCUU	0.0156526
GGGGGA	0.0156514
ACAUUG	0.0156461
UCCAGG	0.0156256
CGUCCU	0.0156104
CUUGAU	0.0156012
AAUGUA	0.0155892
GAGCUC	0.0155876
GGCCGC	0.0155869
AGCAAG	0.0155868
CUUCCA	0.0155715
GCUUUC	0.0155673
GCCUUC	0.0155665
CCAGUG	0.0155257
UUAAUU	0.0155228
CCUUUC	0.0154968
CCCGAG	0.0154932
GAGGUA	0.0154486
GAUAUG	0.0154316
ACUCUG	0.0154112
CCACAG	0.0154006
AUCUGC	0.0153643
AACCAG	0.0153609
GCCCCG	0.0153559
ACCAGA	0.0153245
AACUUG	0.0152884
AGUGUC	0.015276
CUAGGU	0.0152414
AGGGCG	0.0152358
CCCACU	0.015183
GCGCUG	0.0151143
GCCUGG	0.0151017
CGCGCU	0.0150958
GAGACU	0.0150528
CCAUUU	0.0150499
GCGGCA	0.0150469
UCUAUC	0.0150222
CGCCAU	0.0149908
CUGCGG	0.0149861
CGUAUG	0.0149719
UACAUC	0.0149595
CAGCAC	0.014956
UAUAUG	0.0149535
UGGACU	0.0149454
CCCUUC	0.0149343
UUCAAU	0.0149154
AUUCUU	0.0149053
GUCGGC	0.0148943
UCCACU	0.014826
GUAACU	0.0147979
CCCAUG	0.0147846
CUAUUU	0.0147478
CCUCAG	0.0147291
CCCAAC	0.0147291
UGCCCC	0.0147188
UACAAC	0.0147154
UACAGU	0.014678
UUGACU	0.014618
CAAGUU	0.0145236
UGCUAC	0.0144266
AUCAUG	0.014369
GUGCGU	0.0143301
AUUCCC	0.0142485
GGGCAA	0.0142355
CCCCCA	0.0141567
GGCUAC	0.0141419
GGCUGG	0.0140799
GGUCGC	0.014033
GCGGGU	0.0140265
GGGGGC	0.014012
CCAGUA	0.0139494
GAUGAC	0.0139211
GGUUUG	0.0138907
GGGACU	0.0138651
GGCAGA	0.0138515
CUGACC	0.013847
CAUGUC	0.0138466
CGCAGU	0.0138382
AUGAGG	0.0138213
UCCCCC	0.0138149
GUCCGC	0.0138082
GGAUUU	0.0137524
CCUAUC	0.0137303
CCUUAU	0.0136844
ACCACU	0.0136831
GUCAUG	0.0136821
GCGGGC	0.0135932
ACCAGU	0.0135288
UGGGCU	0.0135214
CACACC	0.0135104
CCUGUA	0.0134887
CCGCGC	0.0134765
CCCAGC	0.0134517
GUACCU	0.0134328
AGGCUU	0.0134207
CUGCCC	0.0134141
ACAGGU	0.0133966
GUCCUG	0.013366
AAGUUG	0.0133605
UCUAAG	0.0133489
AGGCGA	0.0133405
GGCCCG	0.0133325
UACAAU	0.0133217
CGGGCA	0.0132423
UACGCU	0.0132408
UUCCGU	0.0132145
CCCCUG	0.0132027
UGGGCC	0.0131302
AUCAGU	0.0131224
GUGGAU	0.0131064
GCGACA	0.0130991
AUCACC	0.0130907
GGAUUG	0.0130653
GAACCU	0.0130589
GCGCGC	0.0130574
UUCUAU	0.0130393
CCUCGC	0.0130246
AAAUAU	0.0129995
AGGCCC	0.012986
CGGGGG	0.0129687
AUCGUU	0.0129012
UUCCCA	0.0128965
CUGCCA	0.0128918
CAGCGC	0.0128594
GAACCC	0.0128573
UGCCUG	0.0128209
GUUACU	0.0128077
GCUCUA	0.0127999
AGGGUC	0.0127211
AACACU	0.0127123
GGAGAC	0.0127058
CAGAUA	0.0126168
CAUGUG	0.0125617
GCCUGU	0.012552
GCUAGG	0.0125497
UAUCAG	0.0125467
ACGCCC	0.0124754
UACCAU	0.0124486
CGAGCA	0.0124316
UGGGGC	0.012417
GUCGAA	0.0124094
AUACGC	0.0124091
AAAUUG	0.0124025
GAUAAG	0.0123853
UACCCC	0.0123676
GUUGCG	0.012326
GUUAUA	0.0122872
ACCGAA	0.0122694
GCUUAC	0.012249
UCCCGC	0.0122366
GCAUUA	0.0122357
ACAACU	0.0121893
GUAUAU	0.0121672
AAAGAU	0.012157
UAUCUG	0.0121301
GUGCAC	0.0120075
CUAAUU	0.0119919
GUUCAC	0.0119713
CCACUU	0.0119523
UUUAUC	0.0119516
GCACGA	0.0119454
UUAUUU	0.0119315
AGUGGG	0.011904
GCUUGC	0.0119012
CGAUAU	0.0118844
CGAAAU	0.0118755
ACAGAU	0.0118725
ACUACC	0.0118707
CCCUUG	0.0118622
CUUUUC	0.0118526
CGAAUU	0.011845
GAAAAG	0.0118403
GGCCGU	0.0118301
GGCGAG	0.0117808
AAGACA	0.011765
AUCGCU	0.0117533
CCCUUU	0.0117429
CCCAGA	0.0117139
CGUAGG	0.0116935
CGUAUA	0.0116681
CGCGCA	0.0116658
AUAUUC	0.0116528
CCCCUC	0.0115966
CCUGUC	0.0115925
ACCGUU	0.0115717
ACCUCU	0.0115687
AAAUUC	0.0115531
GCGCAG	0.0115453
UGGCUG	0.0115373
CGCUGU	0.0114927
UUCCUA	0.0114632
UCCCGU	0.0114352
ACAUUC	0.0114269
CACAUC	0.0114111
GCAUGC	0.0113998
ACUCGC	0.0113975
UUGCAC	0.0113803
GCAGUA	0.0113687
GGUUCA	0.0113567
AACUAC	0.0113401
CAGCUC	0.0113237
CGCAAU	0.0113134
GCCUCU	0.0113011
CUGGGC	0.0112875
GUCGGU	0.0112846
UCCUAC	0.0112797
CUGCUA	0.0112208
CACACU	0.0112136
AAAGCC	0.0112116
GUGCAA	0.0111992
GAAACU	0.0111812
UUUAUU	0.0110986
CGCUUA	0.0110769
AUCCCG	0.011025
GCCUGC	0.0110117
CACCCU	0.0110007
GUUAGG	0.0109788
GUGGUU	0.0109605
AGUCGC	0.010956
CGUGAC	0.0108988
GAGGCG	0.0108821
CCCGUC	0.0108804
CGAGCU	0.0108794
ACCCCG	0.0108594
UCCCAU	0.0108078
CCCAUC	0.010725
CUGUGC	0.0107129
GACAGA	0.0107127
UGUACC	0.0106524
UACUGU	0.0106417
AAGUGC	0.010638
CUCUAU	0.0106258
CCAGAA	0.0106245
AUUCGC	0.0105959
GGCAUC	0.0105784
GAAAGG	0.0105304
CUCGCU	0.0105109
AUGUGG	0.0105021
GGGGAA	0.0104496
CAGCAU	0.0104465
CUCAGG	0.0104098
GUGGUC	0.010403
ACCAGC	0.0103873
GCGGGA	0.0103652
GGUAGC	0.0103488
AGCCUG	0.0103388
AGUCGU	0.0102936
CAAGCC	0.0102877
GCCUUA	0.0102565
CUGAAU	0.010232
UUCCCU	0.010232
GGUAUA	0.0102301
GGCACG	0.0102282
ACACUG	0.0102276
AACAUG	0.0102096
AUGACU	0.0102093
UGGCCA	0.0101481
GUCUGC	0.010143
ACCCCC	0.0101117
AGCAGG	0.010082
GCUCUG	0.0100682
CUUUAU	0.0100602
UGGGGA	0.0100526
GCAAUA	0.0100463
GGGAAA	0.0100156
CCAGGG	0.00999973
CUCUUU	0.00997989
AUGGCC	0.00995393
GUCCUC	0.00987001
GUAAUU	0.0098152
UCUGAC	0.00979792
AACUAU	0.00975074
GUGGGC	0.00974127
UCCCGA	0.00971996
CGUCAG	0.00963459
UCCUGG	0.0095779
CUACGC	0.00957723
GUACGC	0.00956919
GGGCUG	0.00954226
GUAGUG	0.00953642
UCAAUU	0.00952419
UCUAUU	0.00949184
AUGCAC	0.00945512
AAUCCU	0.00943682
AUCGAG	0.00942986
AGGUAC	0.00940789
UUUGAU	0.00940643
GAUCUG	0.00938965
AUGACA	0.00935612
AUAGUU	0.00935265
UCAGCA	0.00932263
ACCAGG	0.00931418
CCAUAC	0.00929396
UACCAC	0.00926696
CGUGUC	0.00924085
CACGGA	0.00921431
CGAAAG	0.00918696
AUAGCA	0.00918507
UGUGCA	0.0091756
CUUUCA	0.0091266
GACUCU	0.00911882
CGUGCG	0.00911518
GCUAGA	0.00911248
GUUCUU	0.00910366
ACCCCA	0.0090864
GAAGCA	0.00907721
AGUCUG	0.00907671
GCUUUG	0.00906756
AAGAAU	0.00906524
UGCUGG	0.00904229
AAUACA	0.00902237
AUCUAC	0.00900305
AGCAUU	0.00898827
GGUUUU	0.00896385
AGGUGC	0.00896277
CUACCU	0.00894989
GUAAAG	0.00894284
CGCUCG	0.0089373
GUCCCU	0.00893079
CGCUAC	0.00893006
CAGGCG	0.00891794
GGGCGC	0.00889217
UUUACC	0.00888789
GCGUAC	0.00887277
GCCAGC	0.00886413
CUGCGA	0.00882675
CGUAAU	0.00882627
GGCCAU	0.00882491
GAAAUA	0.00880108
UUUGGG	0.00879496
CUUUCC	0.00876675
CUUGAC	0.00875886
CCACUG	0.00874428
UUCGCU	0.00870444
ACACUU	0.00864537
UACUAU	0.00863854
UUCCCC	0.0086019
UCCUUG	0.00860137
AUUACC	0.00857977
CGAUAC	0.00856327
CUAGGA	0.00855995
GCGUGC	0.00850767
GGCAAU	0.00848245
GUGUCA	0.00848129
GCCCGC	0.00842366
GUUACA	0.00832703
GGCAGC	0.00831649
AUAUGC	0.00825768
AAUGAU	0.00825197
GCACAC	0.00822307
UAUACC	0.0082128
AAUAUC	0.00819133
UCGCAC	0.00817637
UCUACC	0.00817448
GGGUGG	0.00815878
CGCAGA	0.00815006
CAGCGA	0.00814989
GCGCUU	0.00814784
GCUUAU	0.00811733
GUCACA	0.00811592
GUAUAC	0.0081003
UGCAAG	0.0080989
AUCCAU	0.00807194
UUGCCA	0.00806933
CAGAGG	0.00806551
UUGUAC	0.0080347
UGCAGG	0.00802192
GUCUUG	0.00801774
UGCCUA	0.00800752
GUAGGU	0.00798146
CGUCCA	0.00791282
CAGAUG	0.00789591
CCACCC	0.00789128
UUACGC	0.00789011
GUACCC	0.00788164
UGUGUC	0.00788146
CUGCAC	0.00787725
AAAAAG	0.00787413
CCUCCC	0.00786864
AGCCCA	0.0078681
UACUGG	0.0078599
CACCUG	0.00785546
GUAUGG	0.00782894
CUACUA	0.0078075
AGCGCA	0.00778884
CCCAGU	0.00776041
AGGUUG	0.00772248
GCCGAU	0.00767675
CGCUGG	0.00764472
CUGCUC	0.00764455
GAGGAG	0.00760993
CAGCAA	0.00758269
UGCCUC	0.00754927
GUCAUA	0.00754688
GACAAU	0.00753048
GUAGCU	0.00751613
GUGAUU	0.00749232
GGGGUA	0.00747755
GAUGUA	0.00741181
CUGUUG	0.00740908
GAGAAC	0.00737973
GAUCGC	0.00736565
GGAAGU	0.0073522
GUCAUC	0.00734029
UAUACU	0.00731876
GUAGGC	0.00725454
GACAGU	0.00719197
GAUCGU	0.00714811
UUCAAC	0.00712777
GCCCCC	0.00710971
CGCGAG	0.0070802
UAUGUA	0.00704926
GCCGAA	0.00698204
CCAUCC	0.00697012
AUCCAC	0.00696468
UUGCGC	0.00696292
CGGGCU	0.00692043
GCCCAC	0.00691999
UGGUAU	0.00689948
UUGCCC	0.00688435
UUGAUU	0.00683935
GAAUUG	0.00683412
UACGGA	0.00680895
GCAACA	0.00678167
UCAUUU	0.00676522
AUCAAU	0.00674221
UUGGUA	0.00673561
AUACUU	0.00673088
UACCGC	0.00672758
GUUAGC	0.00669585
GAACGC	0.00669524
UGGCAC	0.00669036
CUUUUG	0.00667246
CCUAUA	0.00667119
ACCCUC	0.00666561
CUCCCA	0.00665208
GUUCCC	0.00659289
CCCAUU	0.00657472
AUGCUA	0.00656732
CGGGGA	0.00656019
CACUUU	0.00655139
GAAUGG	0.00651444
UAUAAG	0.0064766
CCCGGG	0.00647436
UUCAAA	0.00646188
GUCCGA	0.00644631
CCUCGU	0.00643754
AACUUC	0.0064209
UGUGCC	0.0064194
AUUCGG	0.0064078
UCCUAU	0.00640145
CUCAAU	0.00639872
GAGUCC	0.006358
CCCAUA	0.00630926
GGGAUU	0.00629626
UAUCUU	0.00629466
GGGCGG	0.00627523
AUCGGU	0.00627119
AGAGCC	0.00622802
GCGCUA	0.0062222
UUUGCG	0.00620345
ACGUUC	0.00617566
CGUGUA	0.00617302
CAAGUC	0.00616479
CUUAUA	0.00616405
UGCCGU	0.00616348
AAGAGG	0.00616024
AACUGG	0.00615174
AGCCGA	0.00611436
GACUGC	0.00609285
GGGCCG	0.00606993
GUACUC	0.0060594
GCGCAA	0.00604937
AUAGGC	0.00604485
UAUAUU	0.00602641
GACCGC	0.00602018
AUGGUC	0.00601432
GGAAAC	0.0059677
GUAUUG	0.00593597
UCAGCU	0.00592724
GGAGUG	0.00585988
AGGCCG	0.00585501
AUAAUA	0.00583121
GUAUUU	0.00582682
UGCUUC	0.00579716
AAGAUA	0.00579499
UCCCAA	0.00574975
CUACUG	0.00573023
UACGUU	0.00571187
CGCGAC	0.00568901
CCAUUC	0.00565196
UGGACA	0.00564935
GCCUCA	0.0056269
ACCGCA	0.00561395
AAGUCC	0.00557679
AUAAUG	0.00556263
CCUAUG	0.00555983
GUAGUC	0.0055228
AACCUU	0.00551772
UUUCCC	0.00551579
GGACUA	0.00550321
CUAAAG	0.00549645
CUCUGG	0.00546041
CGGGGC	0.00543032
ACAGUA	0.0054271
GGCCUA	0.00540866
AAAGAC	0.0053984
CCCCGA	0.00539498
GUGGCU	0.00538019
AUAGGU	0.00537538
CAUGAC	0.00534247
GCGGAU	0.0053107
GUCACC	0.00530679
GACUCC	0.00529311
AGGACA	0.0052809
GAGUUG	0.00527947
GACAUA	0.0052625
GCAGCG	0.00523436
AUCGGG	0.00521493
GAGCUU	0.00518475
AGCCAG	0.00517945
CUUUAC	0.00517454
UCGGGC	0.00515539
CACGCA	0.00512854
GAUCAG	0.00511845
CCAGAU	0.00511101
CAAUUG	0.00507666
GUUCUA	0.00507097
CAUCUG	0.00506403
GUGAGC	0.00506215
CAUACC	0.00503475
AAAACU	0.00502693
AUCGUC	0.00502026
CUAUCA	0.00499853
ACCUAC	0.00498153
CCCAAU	0.0049807
CACCAG	0.00497975
GUGUUU	0.00495714
CGUUAC	0.00494542
AUCGUG	0.00493328
GAGAAA	0.0048914
ACACCC	0.00485423
CAAGGC	0.00484281
ACAAUG	0.00483784
GUGGCC	0.00482729
UUAACU	0.00480373
CCCUGC	0.00480314
UUCUAC	0.0047779
AUGCAA	0.00475808
GCGUUC	0.00475424
CAGUCC	0.0047448
ACAUCC	0.0046868
AGCGGU	0.00467725
GAGAUC	0.00463566
UGCACC	0.00460324
GUAUGC	0.00452377
GUGUAC	0.00452301
CCAGGC	0.00452285
GUAGUU	0.00451166
AGGCUG	0.00446859
CGCCUG	0.00443397
UGGAUA	0.00443266
GUGUUC	0.00442396
CCUUGG	0.00435848
CUUCCC	0.00435462
UGGGAG	0.00432422
AAUGAA	0.00431753
GCGAGC	0.00431658
GAAAUC	0.00431633
CUAGGC	0.00431107
GCGGCU	0.00431019
CUGGCG	0.00430534
AGCGUC	0.00430521
CCACAC	0.00429377
UCUCGU	0.00427903
CUAGCU	0.00425574
AGGUCU	0.00424607
ACCUGG	0.00420879
UUUACU	0.0041997
AUUUAU	0.00419595
CAUAUU	0.00417794
CGGCGC	0.00415979
UCCUGU	0.00415142
AUAAAU	0.00413121
CCAAGU	0.0040923
UCGCAG	0.00409156
UCCGCU	0.00407923
GUAUCC	0.00407548
GUACAU	0.00407116
CCCACA	0.00405216
GGUCAC	0.00402117
AAGGCG	0.0040209
GCGUCC	0.00398903
AUUGUA	0.00391779
AUCAUA	0.00391071
GGGGAC	0.00389899
GGAGCG	0.0038894
GCCACC	0.00388904
AUGGUA	0.00383087
CCACUC	0.00379015
GCAAGC	0.00377642
GUCCAC	0.00377598
CUUUCU	0.00375534
CAAUAC	0.00374129
UUGCUC	0.00372428
GCUCGG	0.00370589
UAUCCA	0.00368648
GACAGC	0.00366228
AUCACA	0.00364786
AAACUU	0.00364518
UUUCGC	0.0036263
GAUGAA	0.00361565
GUCGAU	0.00360421
GGUUGG	0.0035902
UCUGCG	0.00358794
GAGGAA	0.00357628
GGCCGA	0.00356172
CGACAG	0.00354202
GACGGG	0.00353681
UUGCGU	0.00352514
CAACCU	0.00351945
CGGGCG	0.00340053
GCCGCU	0.00338791
AGUAUU	0.00334723
CUAAAU	0.00333767
CGCAAC	0.00333477
GCGAUA	0.00330598
UUGGUU	0.00328428
AUCGGC	0.00327887
AAAGGG	0.00325535
CCCCAA	0.00325135
CCCUGG	0.00324959
UCGGGA	0.00324506
CUCGGU	0.00318587
GGAAUC	0.0031653
UUGGAA	0.00315268
UACCCG	0.00314123
UGCUUU	0.00313104
CUACGU	0.00310608
UAUCAC	0.00303592
AAGUGG	0.00302207
AGGAAG	0.00299571
CCAACA	0.0029796
UUCGGC	0.00297797
CAAGGG	0.00294162
GGUAGG	0.00290105
UUCGUU	0.00287316
CGUGGG	0.00287006
AUACUA	0.00286269
AGACGU	0.00285538
UCAGGU	0.00285153
UCCUUU	0.0028424
AAUGGU	0.00282622
CUGAUG	0.00280974
ACUUAU	0.0027852
UGCAUU	0.00276803
GAACCA	0.00272743
CUCUAC	0.00270967
GUGAAU	0.0026891
GCCUCC	0.00265181
UUGGAU	0.00264155
AUUUUU	0.00262518
CGACUU	0.00261202
CUCACU	0.00259231
CACUUG	0.0025622
UCAUUG	0.00255526
UUCACA	0.00254949
CUGAUA	0.00253504
ACAUCU	0.00252639
GUCCAU	0.00252409
UGGCCC	0.00250834
CAAGUG	0.00247698
UCAUAC	0.0024583
GAGCGA	0.00244929
GGUAGA	0.00244494
AGGCAU	0.00243578
CGGGGU	0.00240998
ACGCGU	0.00240124
CGUUUG	0.00238701
GGGAAC	0.00238642
CUUAGG	0.00237277
UGGGUC	0.0023307
CCUCAU	0.00230208
CUAACU	0.00228574
GGGGCC	0.00226335
AAACUG	0.00225153
GAGUAU	0.00223656
UUGCAG	0.00221143
CCUAGG	0.00218944
ACUAGG	0.0021781
CGAGGU	0.00217105
AGUGUG	0.00213674
GCGACC	0.00211975
UUCGGU	0.00211704
GUCUUC	0.00211114
CAGCGG	0.00208493
GGGUAC	0.00208073
AGUGUU	0.00207289
GAUAUA	0.00206774
AUGUCU	0.00206172
GAUACA	0.00205494
GGAUCG	0.00205137
CAAUAU	0.00204581
CCUCCA	0.00203338
CUAUAC	0.00199482
GUGUGG	0.00194844
AGACCU	0.00194475
AAAGUC	0.00194164
GUCGCA	0.00192962
UGUAUU	0.00189724
CAUAUC	0.00187495
CGGGAC	0.0018581
CUCAGU	0.00185791
GCGAAG	0.00182484
CAAACU	0.00177509
AUACGG	0.0017513
GUCUAC	0.001744
UGCCAA	0.00172793
AUGCGA	0.00171206
CAAGGA	0.00168195
GGAAUA	0.00168155
AUUUAC	0.00166216
AAGAAC	0.00162935
AGAGCU	0.00162346
UUGGGG	0.00162243
AGCACA	0.00162082
GACCAU	0.00161421
UACCGA	0.00159924
CCAAGG	0.00153701
UUUAAG	0.00150643
AAGAAG	0.00150417
GCCGAG	0.00149566
GCGGAA	0.00144342
AGCUAU	0.00142764
ACUAUA	0.00142289
GACCUC	0.00136734
UCGGCA	0.00136545
GGAUCU	0.00136309
CUGUCC	0.00135466
ACCACA	0.00132015
GAAAUG	0.00129591
AUCUUG	0.0012689
GGGGUG	0.00124944
AACGUG	0.00124839
GCUUGG	0.0012433
CUCGAG	0.00123531
CUGUUC	0.00123286
ACGGGC	0.00122659
CACUAC	0.00120052
GCUCAU	0.00119052
UGGUUG	0.00117588
GGGUGC	0.00116089
CUCGGA	0.00113862
GGCUCU	0.00113712
CGGACC	0.0011353
UCAGGC	0.00107423
AAAGAG	0.00106189
AACCCG	0.00105947
AGGCAA	0.0010557
AUAAAG	0.00104947
ACGCUC	0.00104148
CUGCAA	0.00103264
CGAGGA	0.00101287
GUACCA	0.0010094
CUGACG	0.00100863
GCGAAC	0.000993032
UACGGG	0.000986158
GGGACC	0.000960425
CUGCAU	0.000958573
UGCCCU	0.000936062
CGCGGG	0.000926221
CGUCUA	0.000908163
CUGAUC	0.000877608
AUGCGG	0.000874341
UGCGCA	0.000832109
AUGGUU	0.000819336
AUAAGG	0.000810271
GUAAGG	0.000786662
CCAAUC	0.000782498
UGCUAU	0.000775961
CGCCCG	0.000744875
AUGCCA	0.000732978
CGCAGC	0.000726257
GCAGCC	0.00072322
AUGGAU	0.000705362
ACCAUG	0.000695677
GACGCU	0.000647045
GGGUCU	0.000643665
CACCCA	0.000636139
GCGACU	0.000634837
AUACAG	0.000626767
GAGUGG	0.000597498
AGACAG	0.000568596
GGUAAC	0.000566383
CUCCUU	0.000565182
GUAGCC	0.00055979
AUCAUC	0.000553189
UGGACC	0.000534431
CGCACG	0.000525976
CUCAUG	0.000512554
UUUUUU	0.000497345
ACUUAC	0.000474623
GCGCCC	0.000472013
CGCCUC	0.000459413
CCCGGA	0.000445098
CAUAUA	0.000436814
CCGUAU	0.000423634
CAAUUC	0.000416495
UCUGUA	0.000416132
UUAAAU	0.000400314
AAUAGG	0.000393886
AGUACA	0.000391703
CUAUCC	0.000360997
UGUGUG	0.000315429
AGGAUU	0.000295036
AUCCCC	0.000290987
CCCCGG	0.000252442
UUUAUA	0.000228973
AAAAAU	0.000212055
CCUUAC	0.00020848
GACUGU	0.000186149
CCCUCA	0.000183757
GUUAAU	0.000169452
CACUCC	0.000160791
GUGAUG	0.000157337
GUCUGU	0.000146001
CGCAUA	9.3622e-05
AUCGAC	8.25495e-05
ACGGGU	7.74881e-05
GAUAGG	7.11629e-05
AACAUA	6.76485e-05
AGUAUG	4.18611e-05
UGGCAU	3.30692e-05
AGGUUC	2.29914e-05
GAAAAU	2.19427e-05
CCACAU	1.32122e-05
GUAGGA	-8.25428e-06
ACUCGG	-4.19006e-05
GGGUUG	-7.51272e-05
GUAACC	-9.93553e-05
GUACUU	-0.000113214
CUUCCU	-0.000117689
AUCAGC	-0.000172026
GCGCGA	-0.000172476
UUCGGG	-0.000179612
CCGGGC	-0.000179795
CGAGGC	-0.000228301
UUGCGA	-0.000239139
UUUCUG	-0.00027171
CCACGC	-0.000281913
AUACCA	-0.000301567
AUCCCU	-0.000311819
AUAGCC	-0.000326589
UGUGGU	-0.00035293
CGGUAC	-0.000367624
GUCGUC	-0.000371974
UUCAUG	-0.000395507
AUAUCG	-0.000404453
GGAGUA	-0.000422733
CGGGUG	-0.00042621
GACAAC	-0.000428587
UGCACA	-0.000428929
GCGGGG	-0.000453911
AAACAG	-0.000462785
UUUGUA	-0.000468402
GCACCG	-0.000469343
CCAAAA	-0.000488735
CAGCUA	-0.000493928
AUGUAU	-0.000534484
ACCGCU	-0.000547064
ACAAUA	-0.000586454
CGUUCC	-0.000622784
ACGAUU	-0.000625988
AUCACG	-0.000633461
CCGCUG	-0.000641624
GAGAGG	-0.000657731
AAUGCG	-0.000676586
UCGCGU	-0.000681886
CGCCUA	-0.000701787
AUUUCC	-0.000704382
CCCGCA	-0.000707615
GGUUCC	-0.000773512
GCGCAC	-0.000778367
AAUCGC	-0.000806501
AGUACC	-0.000808425
CACGCU	-0.000857324
GAGCAA	-0.000874846
CCCGCC	-0.000879881
GUCAGC	-0.000884778
AUGUGC	-0.000893944
CGCCCC	-0.000896897
CUUCGG	-0.00093569
CGACUA	-0.000963514
AACCGU	-0.00098008
CAUAAG	-0.000991653
GUAUCU	-0.000992788
UCUCAG	-0.000993072
CUGUUA	-0.0010055
GUAUCA	-0.00101052
AUUAUA	-0.00102496
CCUCUA	-0.00106898
UUGCAA	-0.00109358
AGCCGU	-0.0011226
AUUACG	-0.00112719
ACCUGC	-0.00112974
UUGUCC	-0.00117266
CCAUUG	-0.00118102
CGUUCA	-0.00118326
UCCAGU	-0.00118816
ACCAAU	-0.00120149
CAUACA	-0.00120174
GGAGGG	-0.00120536
CUCCGC	-0.00122826
ACAGCG	-0.00124682
CUUAUG	-0.00125783
UUCCAA	-0.00127233
CUUCUA	-0.00127837
UCAUAU	-0.0012875
GAAGGG	-0.00128954
GUCCAA	-0.00129512
CCCACC	-0.00131865
UGGCAG	-0.00135692
GCGCAU	-0.00135942
CACCCC	-0.00141754
UGGGUG	-0.00143125
ACGCAC	-0.00144714
GCAUGU	-0.00147705
CGCUCU	-0.00148746
CUUAAU	-0.00152731
CUGUGG	-0.00153018
AAUACU	-0.00153478
CGCACC	-0.00154094
UCCCUA	-0.00158383
AUAGGG	-0.00160009
CGGUCC	-0.00161185
CAUGUA	-0.00164217
UGGUUU	-0.00169201
GAGUGC	-0.00176487
GCUACG	-0.00177994
CCCCUA	-0.00178037
CGCUGC	-0.0017886
GUAACA	-0.00181354
AUGAUA	-0.0018278
GCAUCG	-0.00183632
UGGGCG	-0.00184595
UGUACU	-0.00185999
AUGGGG	-0.00186891
AUAUUG	-0.00187845
ACCUCA	-0.00192762
GCGCCA	-0.00193613
GAACUA	-0.00193991
AUCCAA	-0.00193992
CGAAUA	-0.00194344
CCCGAU	-0.00195222
ACAAAU	-0.0019841
ACAGAA	-0.00198796
UACGUC	-0.00199708
GGGAUG	-0.00199852
GCGGCC	-0.00200021
GCGGAC	-0.00200728
GUUUCC	-0.00203391
AAGCGG	-0.00203605
CAACGC	-0.00210185
UCGCGC	-0.00210577
ACUUGG	-0.00213207
AGCCUU	-0.00217341
AGCGAA	-0.00218047
UUGAAA	-0.00218623
ACUCUC	-0.00222011
UUGCCU	-0.00222243
GAUCUU	-0.00230732
GAAGUG	-0.00231733
GUGAUC	-0.00233243
CGUUUU	-0.00234118
GUUAUG	-0.00236687
UACCUC	-0.00237285
ACACAC	-0.00242294
AUACGU	-0.00243616
CGAGUA	-0.00247412
CCAAAU	-0.00247438
GUUUAU	-0.00252517
GGAACG	-0.0025406
AUCGCC	-0.00254209
ACCGUG	-0.00260019
GGGUUC	-0.00261601
AUCCGG	-0.00264594
AAUCUG	-0.00266801
GAUAGC	-0.00267833
AGUCCU	-0.00269062
CCUCAC	-0.00272191
GGGGCG	-0.00273585
UAUUCU	-0.00274249
CCGCGA	-0.00278525
AGUCAG	-0.00280813
ACUCAA	-0.00286002
AUAAUU	-0.00287366
UAUAAU	-0.00292858
UACUUC	-0.00295876
UCGCAU	-0.00299457
UUGAUC	-0.00300741
UAUUUG	-0.00301932
GAUUAC	-0.00302958
AGCUGG	-0.00306244
GAAUGC	-0.00306332
CGCGCG	-0.00306463
CCCGCG	-0.00307383
AUAAGU	-0.00310675
GGCUGU	-0.0031152
CGACCU	-0.00311881
GCGAUC	-0.00311922
CCACGA	-0.00312825
UUGGAG	-0.00314645
GGAAGC	-0.00316432
AGUGAG	-0.00318466
AGUAUA	-0.00319028
CGCUUU	-0.00320394
UACGCC	-0.00321247
AUUACA	-0.00321414
CGUAGU	-0.00322207
CUGUCU	-0.00322649
UAUUCC	-0.00325727
GUCCCG	-0.00325851
AUCUGU	-0.00327361
CUAGAU	-0.00328562
CUACAG	-0.00328818
ACACGG	-0.00329264
CCGCUA	-0.00329551
AUUAAC	-0.00329631
CCGGGU	-0.00332278
CUGGUA	-0.00334172
UUGGUG	-0.00336544
GCGUCU	-0.0034003
UCGCUC	-0.00341256
AUUUCU	-0.00342768
GUUAAA	-0.00342798
CAGACA	-0.00345121
GUCCCC	-0.00346674
UGGAUG	-0.00347708
CAUGGC	-0.0034814
AUUAAA	-0.00349432
AUACCC	-0.00351897
UAUCGC	-0.00353343
AUCCGC	-0.0035337
CCAUGG	-0.00354194
UUCGCA	-0.00355525
CUAUUC	-0.00362802
UUGUUC	-0.00367136
UCUGUC	-0.00368134
GUAGGG	-0.00370392
UCUCGC	-0.0037165
AGCAUA	-0.00372377
CCAAUG	-0.00372612
CAUUUC	-0.00375206
AGCGGG	-0.0037841
AUAGGA	-0.00381872
GGGAUA	-0.00388358
GUGCGG	-0.00388441
ACCGAU	-0.00391415
GGCGUU	-0.00391814
CGGACA	-0.00393993
ACGCAG	-0.00394642
ACCCAA	-0.00395912
UUGCGG	-0.00396655
CAUGCG	-0.00400752
UACGAG	-0.00401986
UUCAUA	-0.00404045
AUUAGC	-0.00404569
UUCCGC	-0.00407548
GUUCAA	-0.0040814
CACCCG	-0.00411306
AUGUUU	-0.00412153
UUAUGC	-0.00415888
UCCAUU	-0.00418618
ACCUCC	-0.00420262
AGACCC	-0.00420999
CGGAUG	-0.00421692
CGAUCU	-0.00422954
CCUUUU	-0.00424885
CCACCA	-0.00427458
GUAUUA	-0.00430829
UGGCGC	-0.00431146
ACGGGA	-0.00434865
UUCUUG	-0.00435554
GUAGAU	-0.00436911
CUCGCA	-0.0043775
UUACUG	-0.00438173
UACAUA	-0.00439696
CCUCUG	-0.00440372
CCCACG	-0.00442375
CUGUUU	-0.00449439
ACGGGG	-0.00449626
AACACC	-0.0044975
GGAGGA	-0.00451537
GCCGGU	-0.00453574
ACUUUU	-0.00457126
AGGCGC	-0.00462572
GAAGUA	-0.00470335
AUCAAC	-0.00470395
CCGCAC	-0.00470742
CCAAUA	-0.00471168
[truncated: 1,723 more rows]

[truncated: 8 more sheets: 11, 12, 13, 14, 15, 16, 17, 18]
