# Supplementary material
Source: HighWire-hosted journal article supplement (doi:10.1101/rna.080900.125)
Supplement: Supplemental_legends.docx [file Supplemental_legends.docx]

**Supplemental Figure 1. Individual mRNAs vary in codon usage**

(A) Distribution of codon biases of 16,749 individual transcripts expressed in 5-d-old Arabidopsis thaliana seedlings. Codon bias was calculated for each transcript; if a transcript did not encode a given amino acid, it was not counted in the distribution. Boxplots are overlaid on violin plots showing codon bias distributions. Vertical black lines behind violin plots represent expectation if codon usage for a given amino acid was random. Note: Trp and Met have a single codon, therefore do not have bias, but are included for completeness.

(B) Codon bias (upper) and log2 codon bias relative to genome-wide codon bias for mRNA *t*1/2 quantiles (increasing left to right; subset of data in Fig. 1C).

**Supplemental Figure 2. Codon frequencies correlate with mRNA *t*1/2**

A scatter-density plot for each codon compares codon frequency (as percent) with log10 mRNA decay rates. Linear regression fit is indicated by black lines and r2 and p-values label each plot. Hexagon colors indicate point (individual mRNA) density. Codons are presented alphabetically by amino acids and significant trends are highlighted by outline.

**Supplemental Figure 3. Transcript features and codon usage.**

(A) Multiple regression model coefficients for significant codons indicates the size of the influence of each codon on decay rate.

(B) ACT2 and ZAT10 *t*1/2s from *proUBQ10::YFPstab* and *proUBQ10::YFPunst* transgenic plants.

**Supplemental Figure 4. AtNOT3 NTD conservation**

(A) Alignment of yeast Not5 N-terminal region from representative eukaryotes homologs. Residues shown to interact with the ribosome E-site by Buschauer et al. (2020) or P-site tRNA by Zhu et al. (2024) are indicated with asterisks. Comparing Sc with At directly, identical residues: R4, K44, K50, K55, Q57, R60, K64, K101, K103, F105; similar residues: Sc->At: K58->R, A109->G, different and conserved in all other species (Sc->At): Q8->G, S40->N, H41->Q.

(B) NTD sensor structure (AlphaFold) comparison with ScNot5 E-site interface residues labeled. Electrostatic charge is colored as red (positive), white (neutral), and blue (negative) (Jumper et al. 2021).

**Supplemental Figure 5. SCs calculated for frameshifted trinucleotides suggest neighboring codons contribute to codon-mediated stability variation.**

(A) SCs of dicodons. Hierarchical clustering of codons in the first (5’) or second (3’) position of the dicodon. Outlined boxes indicate SCs 17 dicodons (AGG-CGA, AGG-CGG, AUA-CGA, AUA-CGG, CGA-AUA, CGA-CCG, CGA-CGA, CGA-CGG, CGA-CUG, CGA-GCG, CUC-CCG, CUG-AUA, , CUG-CCG, CUG-CGA, GUA-CCG, GUA-CGA, GUG-CGA) found to be inhibitory to translation in a wobble-decoding dependent manner in yeast by Gamble et al. (2016).

(B) The effect of a the 5’-neighboring nucleotide on codon SC. Heatmap of N-COD SC deviation (mean of N-COD SC by codon - N-COD SC).

(C) CSC comparison of Arabidopsis with *S. cerevisiae*, *S. pombe*, *X. tropicalis*, *D. rerio*, *T. turgidum*, and *H. sapiens*. Plots are labeled with Pearson correlation values.

(D) The effect of a the 3’-neighboring nucleotide on codon SC. Heatmap of COD-N SC deviation (mean COD-N SC by codon - COD-N SC) for *S. cerevisiae*, *X. tropicalis* and *D. rerio*.

(E) Comparison of Arabidopsis COD-N SC deviation with those of *X. tropicalis* and *D. rerio*. COD-N combinations are colored by the codon 3’ nucleotide and the adjacent nucleotide pair. All COD-N combinations (top) and just those with UG or UU adjacent nucleotides (bottom).

Supplemental Data.xlsx – 18 worksheets:

1. Supplemental Data 1. Table of linear regression values. Log10 decay rate was regressed on -log2 relative codon bias (relative to genome-wide codon bias) for each codon separately. Significant slopes (p value < 0.01) are red.
2. Supplemental Data 2. Trinucleotide SCs from scrambled CDSs (x10,000), codons, +1 frame, +2 frame.
3. Supplemental Data 3. Table of multiple regression values from regression of decay rate on composite codon frequency. Decay rate (log10) was modeled as the sum of codon terms and a constant. Codon terms were composed of the product of codon frequency variable and its coefficient. Coefficients were estimated through multiple regression on 16,935 Arabidopsis seedling mRNAs and indicate how much influence each codon frequency has on decay rate.
4. Supplemental Data 4. Codon decay coefficients of codons with significant terms from multiple regression of log10 decay rate on composite codon frequency using 7,555 mRNAs that are more than 50% VCS-dependent in a Col-0/sov background.
5. Supplemental Data 5. Codon decay coefficients of codons with significant terms from multiple regression of log10 decay rate on composite codon frequency using 3445 mRNAs that are more than 50% VCS-dependent in an SOV background.
6. Supplemental Data 5. Codon decay coefficients of codons with significant terms from multiple regression of log10 decay rate on composite codon frequency using 6020 mRNAs that are more than 50% RH-dependent in a Col-0/sov background.
7. Supplemental Data 7. Codon decay coefficients of codons with significant terms from multiple regression of log10 decay rate on composite codon frequency using 6007 mRNAs that are less than 50% RH&VCS (with or without SOV) dependent.
8. Supplemental Data 8. tRNAscan-SE2_folding results for 206 unique tRNA sequences. After folding prediction, sequences were checked for conservation of NOT3 interacting residues.
9. Supplemental Data 9. GO enrichment among genes with the 5 pct highest Arg codons AGA and CGG combined frequency.
10. Supplemental Data 10. Contiguous dicodon SCs. Compare Fig. 4A.
11. Supplemental Data 11. Reciprocal dicodon SC differences (∆diCSC).
12. Supplemental Data 12. Neighboring codon adjacent nucleotides SCs.
13. Supplemental Data 13. Codon + 5'-nt (N-COD) and codon + 3'-nt (COD-N) SCs.
14. Supplemental Data 14. Composite COD-N multiple regression model coefficients for Arabidopsis. Table of multiple regression values from regression of decay rate on composite COD-N frequency. Decay rate (log10) was modeled as the sum of COD-N terms and a constant. Terms were composed of the product of COD-N frequency and its coefficient. Coefficients were estimated through multiple regression on 16,935 Arabidopsis seedling mRNAs and indicate how much influence each COD-N frequency has on decay rate.
15. Supplemental Data 15. Table of multiple regression values from regression of decay rate on composite codon frequency. Decay rate (log10) was modeled as the sum of codon terms and a constant. Codon terms were composed of the product of codon frequency variable and its coefficient. Coefficients were estimated through multiple regression on 33,430 wheat mRNAs and indicate how much influence each codon frequency has on decay rate (Wu et al. (2024).
16. Supplemental Data 16. Composite COD-N multiple regression model coefficients for wheat. Table of multiple regression values from regression of decay rate on composite COD-N frequency. Decay rate (log10) was modeled as the sum of COD-N terms and a constant. Terms were composed of the product of a COD-N frequency variable and its coefficient. Coefficients were estimated through multiple regression on 33,430 wheat mRNAs and indicate how much influence each codon frequency has on decay rate (Wu et al. (2024).
17. Supplemental Data 17. Coding sequences of YFP synonymously encoded with codons used by stable mRNAs (YFPstab) or unstable mRNAs (YFPunst) based on mRNA decay rate associations with codon usage.
18. Supplemental Data 18. Table of primers used in this study.
